# Supplementary material for: Elucidating the role of the o-methoxy group in the lower rim appended salicylideneamine substituents of calix[4]arene ligands on the molecular and electronic structures of dinuclear Fe(iii)-based diamond-core complexes
Source: Royal Society of Chemistry journal article supplement (doi:10.1039/d4ce00347k), 2024-01-01
Supplement: d4ce00347k1.pdf [file d4ce00347k1.pdf]

## Supporting information

# Elucidating the role of the *o*-methoxy group at the lower rim appended salicylideneamine substituents of calix[4]arene ligand on the molecular and electronic structure of dinuclear Fe(III) based “diamond core” complexes

Iuliia V. Strelnikova<sup>a,b</sup>, Ilya D. Shutilov,<sup>a</sup> Alexander S. Ovsyannikov<sup>a,\*</sup>, Daut R. Islamov<sup>c</sup>, Andrew V. Pyataev<sup>b</sup>, Tatiana P. Gerasimova<sup>a</sup>, Ayrat R. Khamatgalimov<sup>a</sup>, Mikhail N. Khrizanforov<sup>a,b</sup>, Aidar T. Gubaidullin<sup>a</sup>, Vladimir A. Burilov<sup>b</sup>, Svetlana E. Solovieva<sup>a</sup>, Igor S. Antipin<sup>b</sup>

<sup>a</sup>Kazan Federal University, Kremlevskaya 18 str, Kazan 420008, Russian Federation

<sup>b</sup>Arbuzov Institute of Organic and Physical Chemistry, FRC Kazan Scientific Center, Russian Academy of Sciences, Arbuzova 8 str, Kazan 420088, Russian Federation

<sup>c</sup>Laboratory for structural analysis of biomacromolecules, Kazan Scientific Center of Russian Academy of Sciences, Lobachevskogo 2 str, Kazan 420008, Russian Federation

<sup>d</sup>National Research Centre “Kurchatov Institute”, Acad. Kurchatov 1 Sq., 123182 Moscow, Russian Federation

\* Corresponding author:

E-mail address: [osaalex2007@ramble.ru](mailto:osaalex2007@ramble.ru)

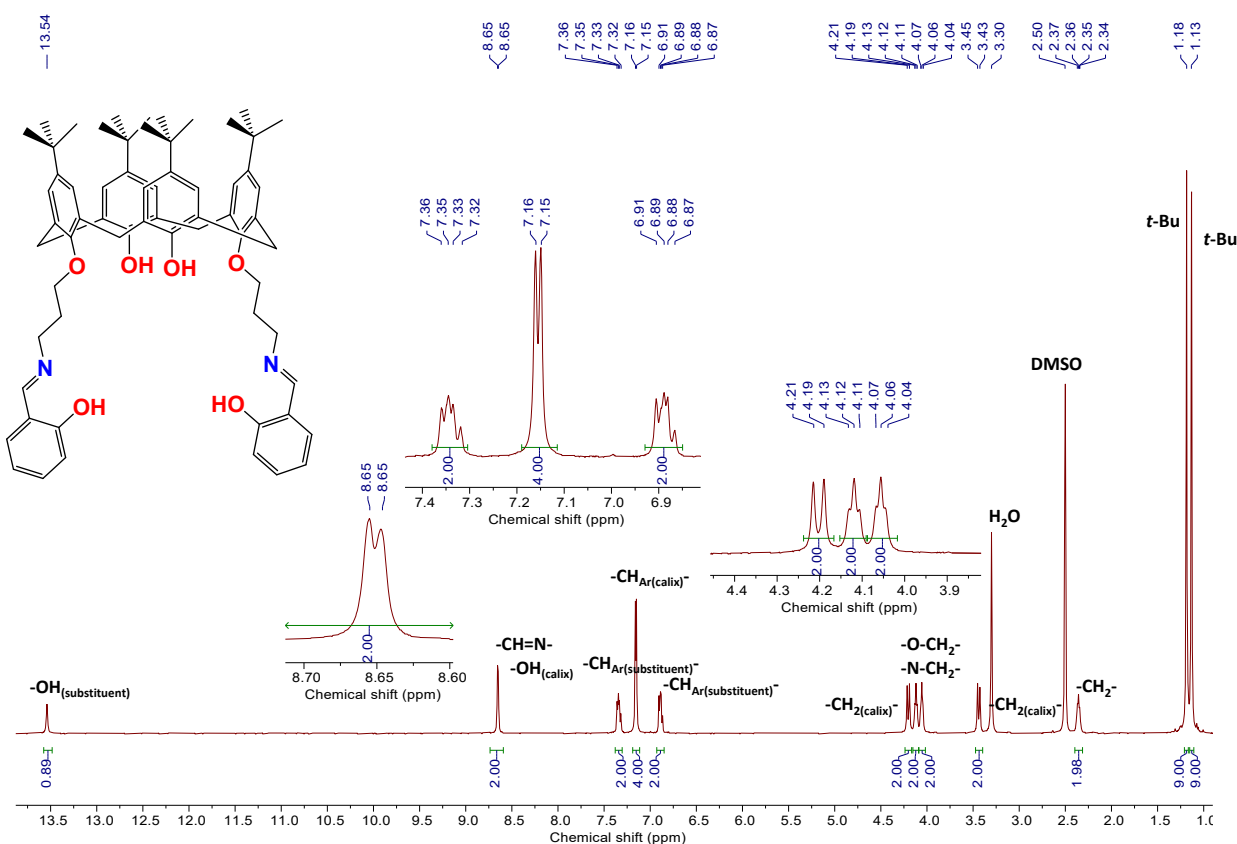

Figure S1. <sup>1</sup>H NMR spectrum for 4 (DMSO-*d*<sub>6</sub>, 400 MHz, 25 °C).

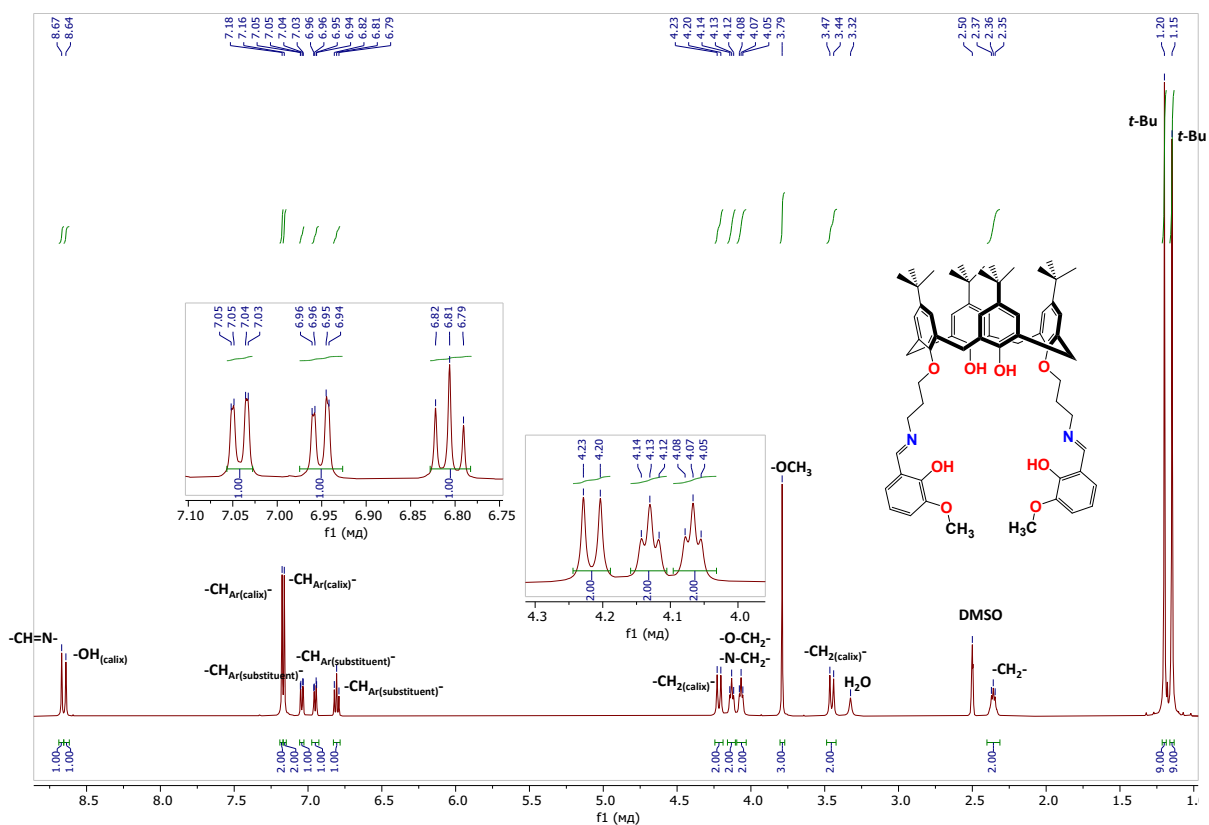

Figure S2.  $^1\text{H}$  NMR spectrum for **5** (DMSO- $d_6$ , 400 MHz, 25  $^\circ\text{C}$ ).

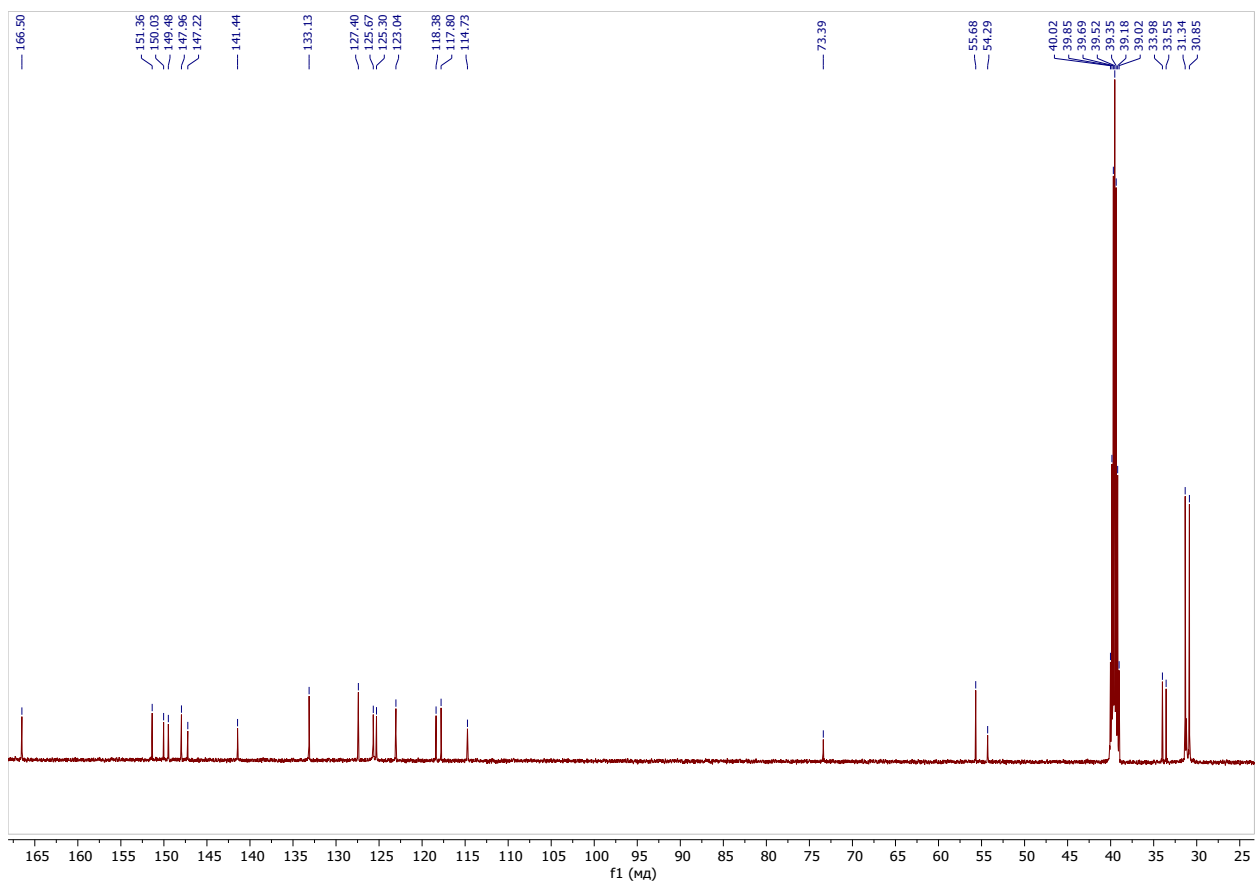

Figure S3.  $^{13}\text{C}$  NMR spectrum for **5** (DMSO- $d_6$ , 125 MHz, 25  $^\circ\text{C}$ ).

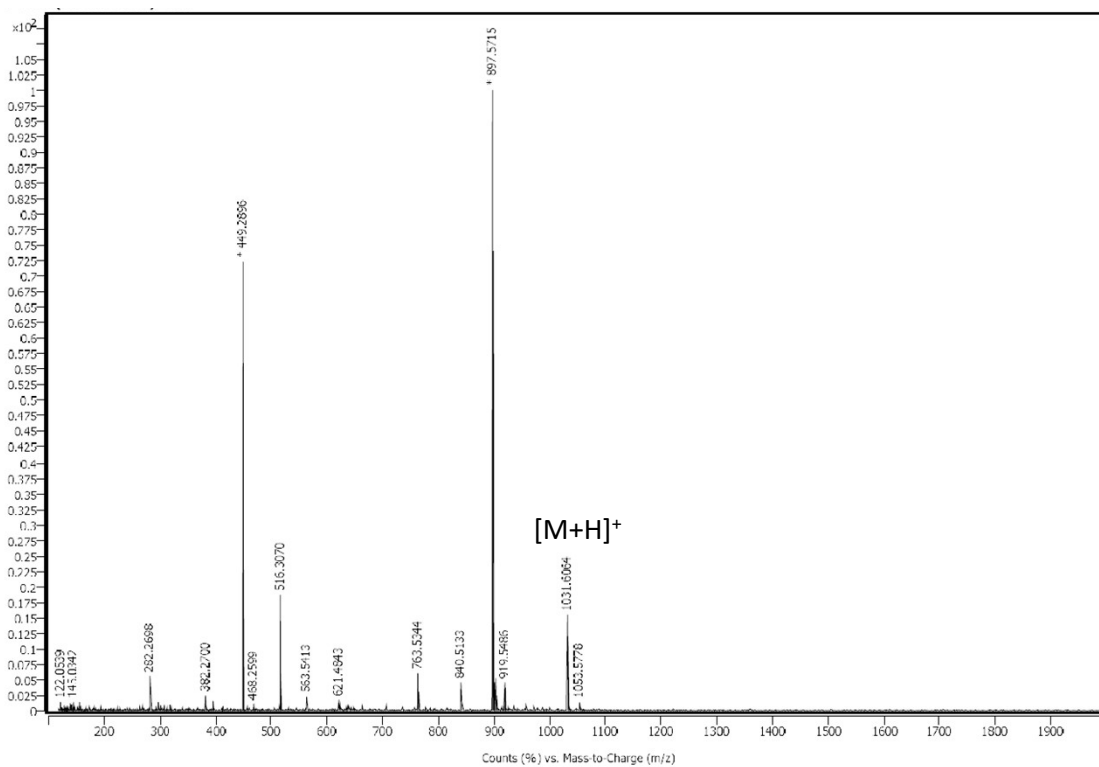

**Figure S4.** HRESI-MS spectrum for **5**.

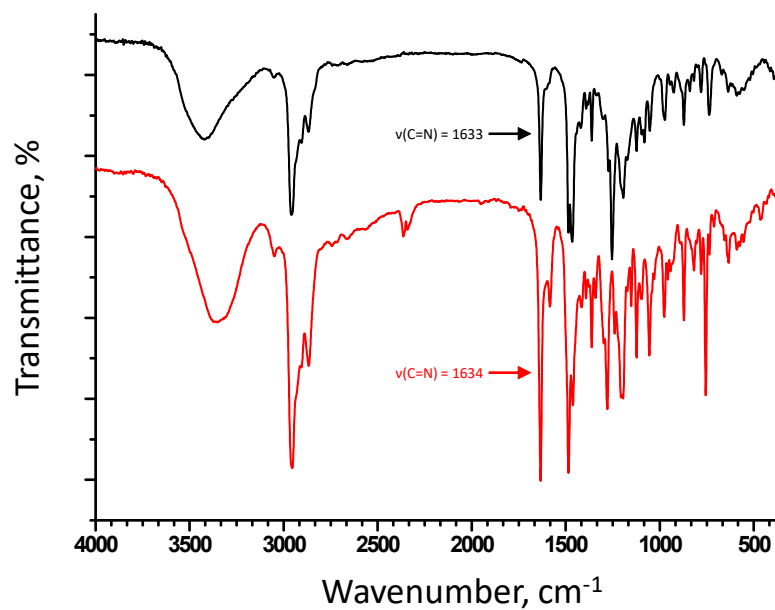

**Figure S5.** Comparison of IR spectra for **4** (red line) and **5** (black line).

HOMO

LUMO

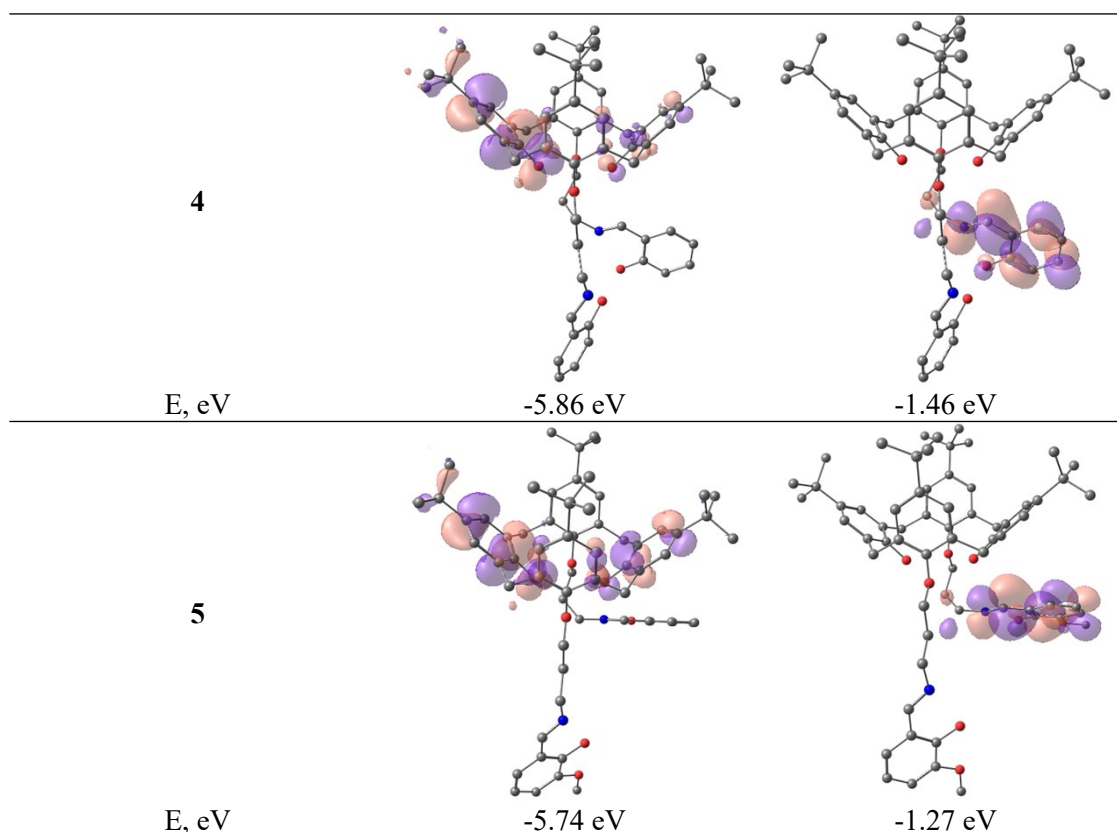

**Figure S6.** Calculated HOMO and LUMO orbitals for ground singlet states of **4** (top) and **5** (bottom).

**Table S1.** The calculated bond lengths of salicylideneamine moieties for **4** and **5**, according to DFT-calculations.

|               | <b>4</b> | <b>5</b> |
|---------------|----------|----------|
| d(N1...C1), Å | 1.275    | 1.275    |
| d(N2...C4), Å | 1.287    | 1.288    |
| d(C1...C2), Å | 1.473    | 1.472    |
| d(C4...C5), Å | 1.461    | 1.459    |
| d(C3...C4), Å | 1.420    | 1.408    |
| d(C5...C6), Å | 1.418    | 1.415    |
| d(C4...O1), Å | 1.353    | 1.355    |
| d(C6...O2), Å | 1.361    | 1.345    |

### Checkcif reports responses for 4<sub>2</sub>-Fe<sub>2</sub> (CCDC 2256649)

The following Alerts of B level appeared upon checkcif procedure:

RINTA01\_ALERT\_3\_B The value of R<sub>int</sub> is greater than 0.18.....R<sub>int</sub> given 0.206

PLAT020\_ALERT\_3\_B The Value of R<sub>int</sub> is Greater Than 0.12 .....0.206 Report

PLAT084\_ALERT\_3\_B High wR2 Value (i.e. > 0.25) ..... 0.40 Report

**Response:** *These Alerts B are caused by a poor quality and the partial decomposition of the crystal upon the XRD experiment which was observed even under liquid nitrogen cooling conditions. Unfortunately, all attempts to obtain the crystallographic data of better quality were failed.*

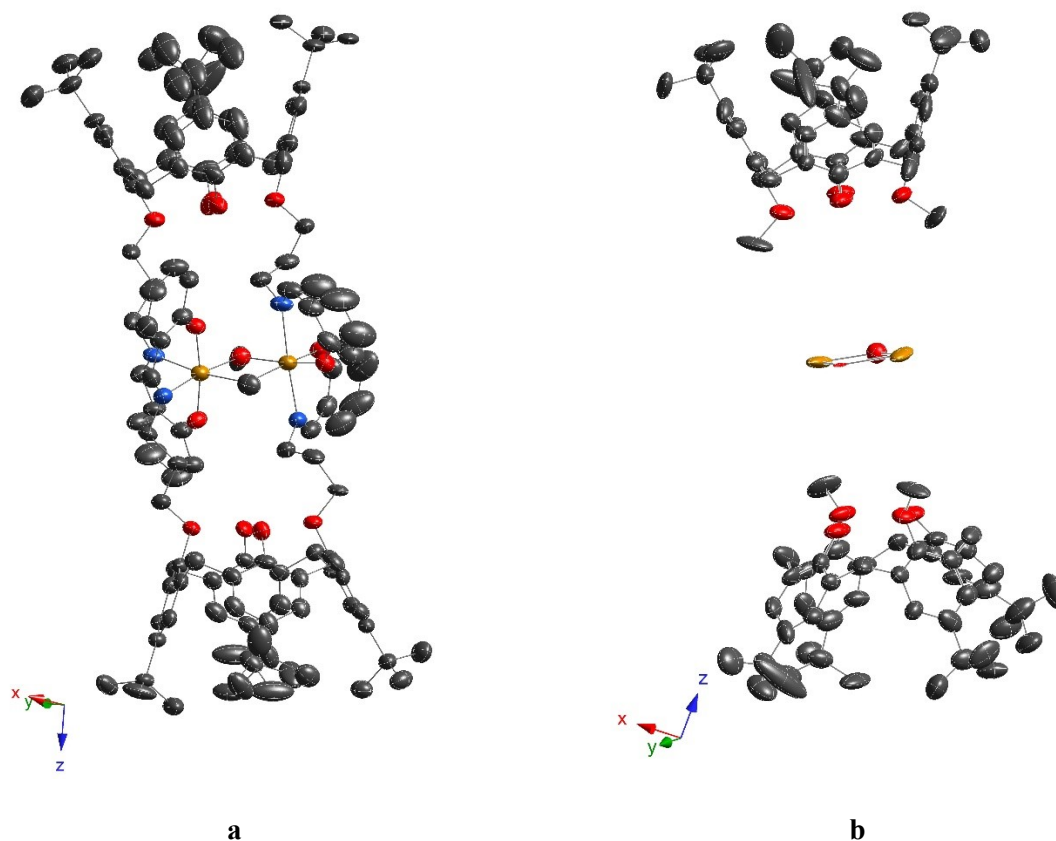

**Figure S7.** ORTEP view for molecular structure of 4<sub>2</sub>-Fe<sub>2</sub> exp (a) and 5<sub>2</sub>-Fe<sub>2</sub> exp (b) (partially solved structure) with 30% probability. Dark grey, red, goldish and blue ellipsoids represent C-, O-, Fe- and N-atoms, The disordered atoms, H-atoms and solvent molecules are omitted for clarity.

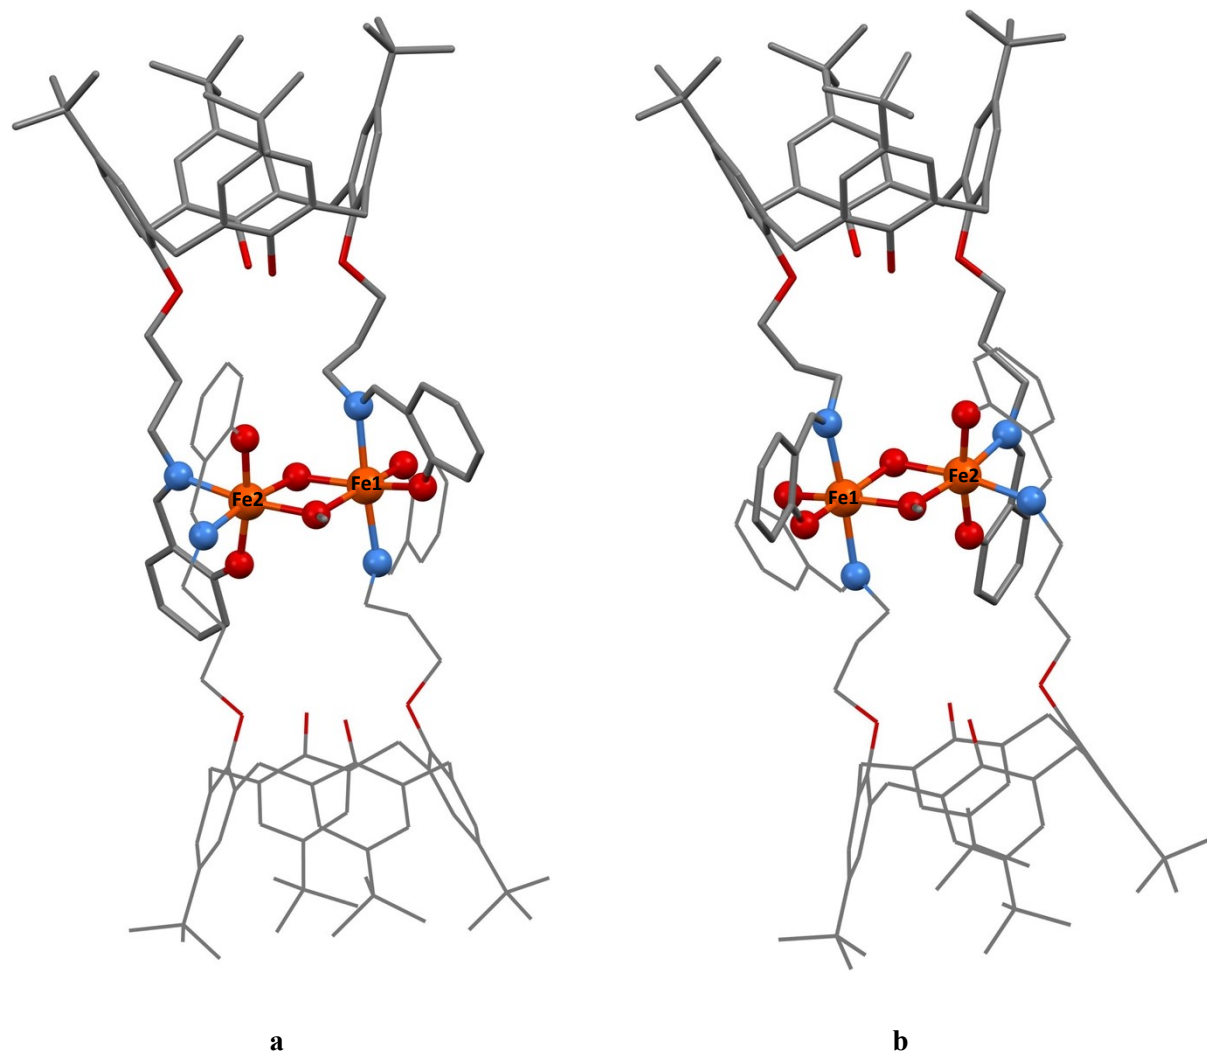

**Figure S8.** For  $4_2\text{-Fe}_2_{\text{exp}}$ , two enantiomer complexes (a,b) in crystal unit, showing the macrocycle ligand coordination mode, resulting in *trans/cis* orientation of N-atoms of salicylideneamine coordinating sites around coordinated Fe1 and Fe2 metallic centres.

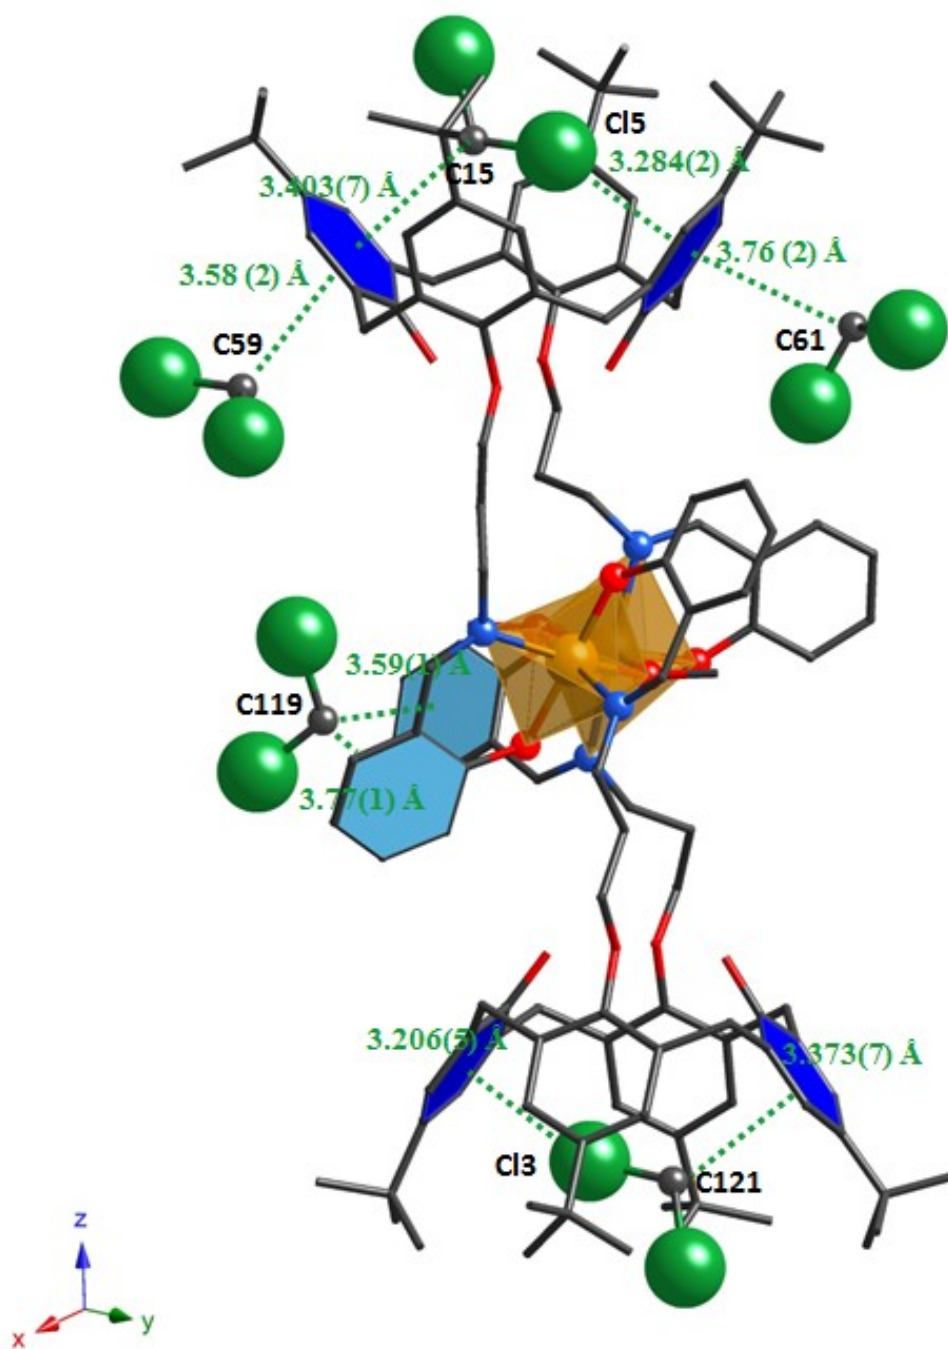

**Figure S9.** For  $4_2\text{-Fe}_2$  <sub>exp</sub>, non-covalent interactions within the crystal packing: CH/ $\pi$  bonding involving solvent  $\text{CH}_2\text{Cl}_2$  molecules and aromatic units of calix[4]arene ligand.

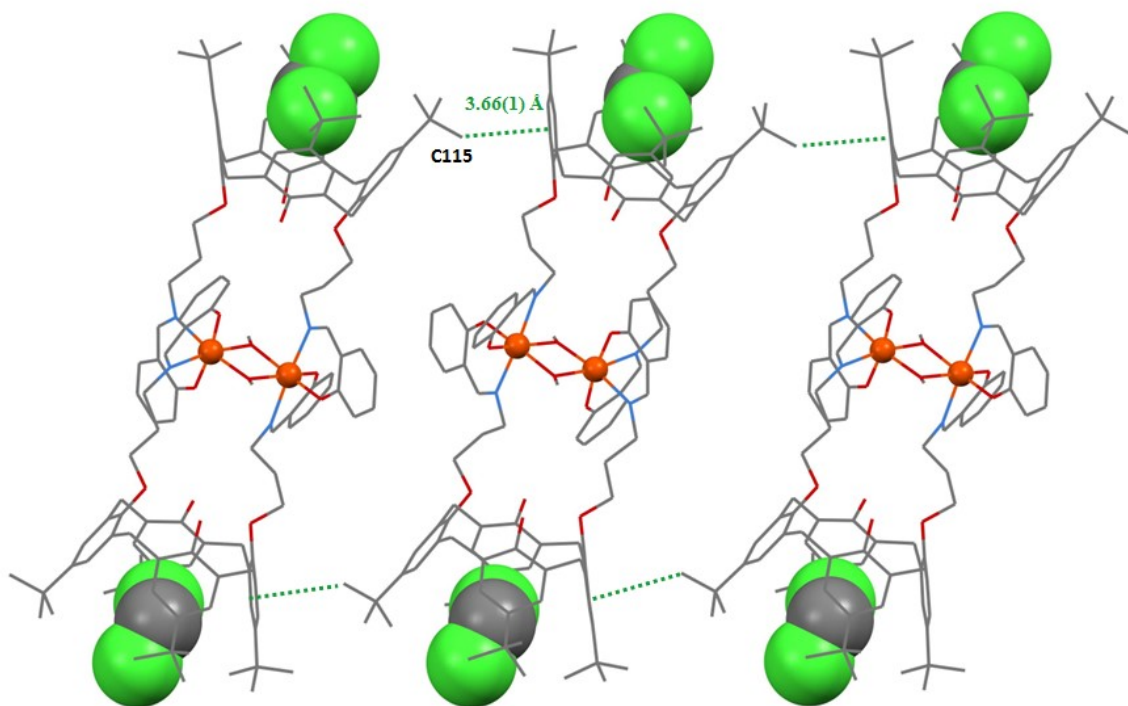

**Figure S10.** For  $4_2\text{-Fe}_2_{\text{exp}}$ , a portion of crystal packing, showing a formation of 1D chains supported by weak noncovalent CH/ $\pi$  interactions between the C115 atom of tert-butyl group with aromatic system of aryl moiety belonging to calix[4]arene backbone of adjacent complex molecule. Brown, green and dark grey spheres represent Fe-, Cl- and C-atoms. H-atoms and solvent molecules located in between the complex species are omitted for clarity.



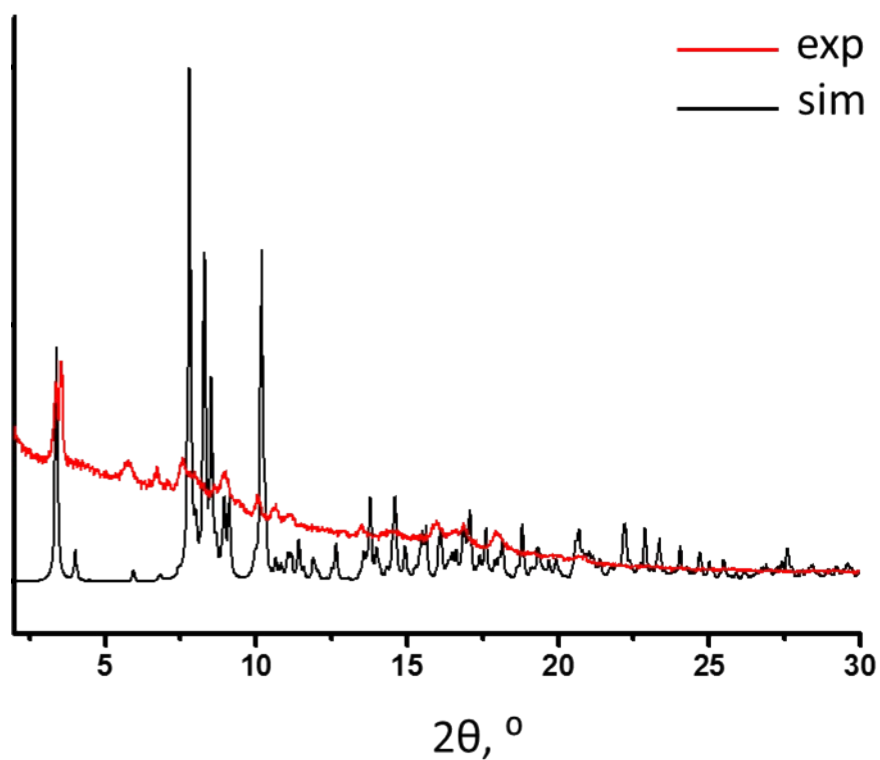

**Figure S11.** Comparison of experimental PXRD pattern (exp) for  $4_2\text{-Fe}_2$  exp with the simulated one (sim).

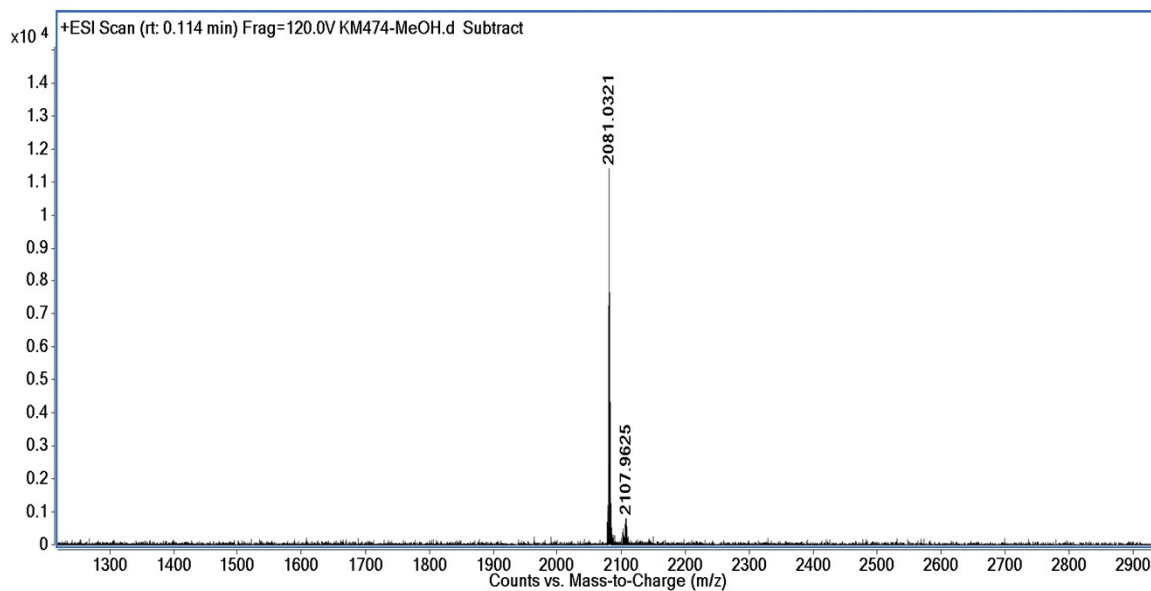

**a**

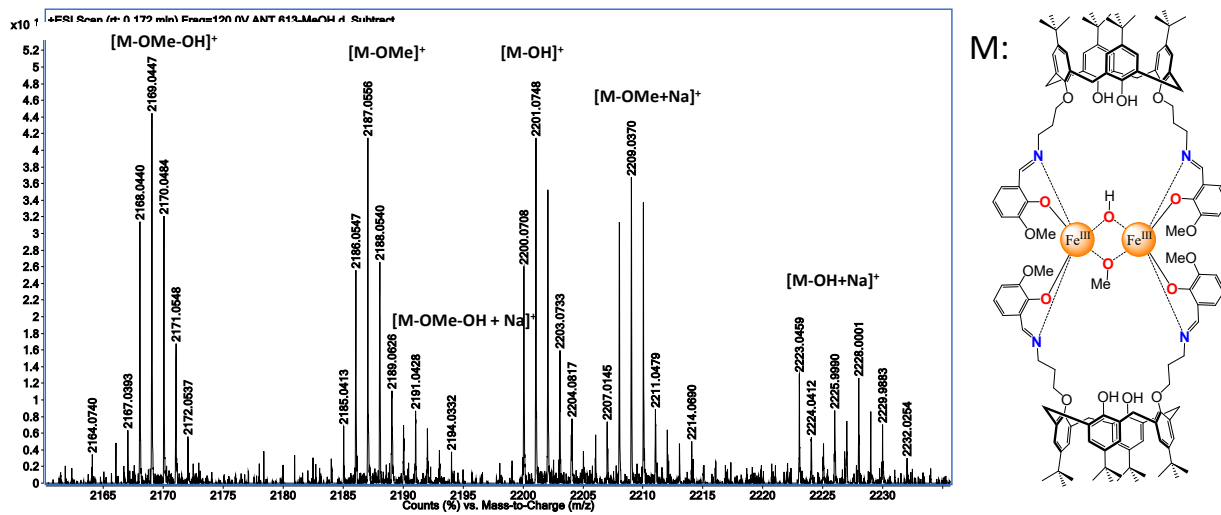

**b**

Figure S12. The HRESI-MS spectra for **4**<sub>2</sub>-Fe<sub>2</sub> exp (a) and **5**<sub>2</sub>-Fe<sub>2</sub> exp (b).

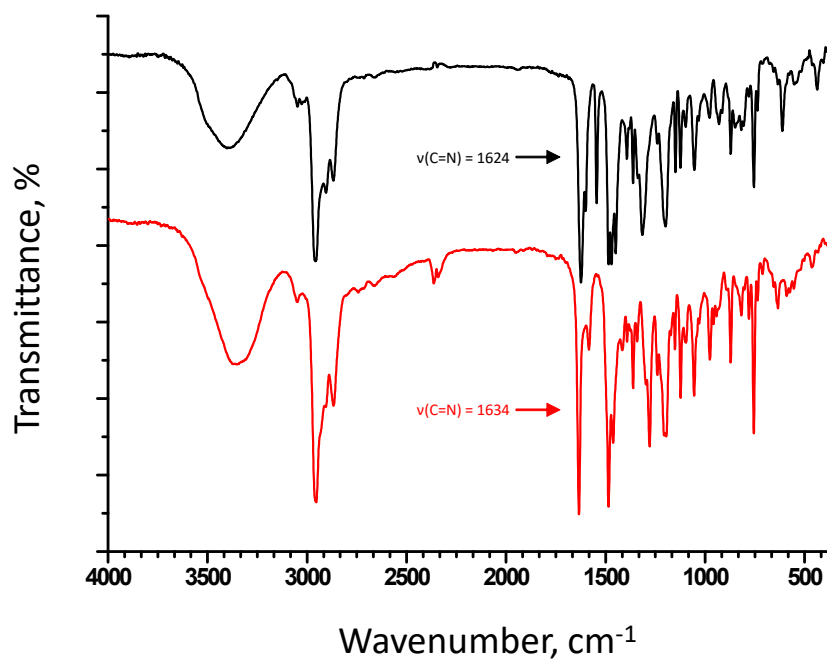

**a**

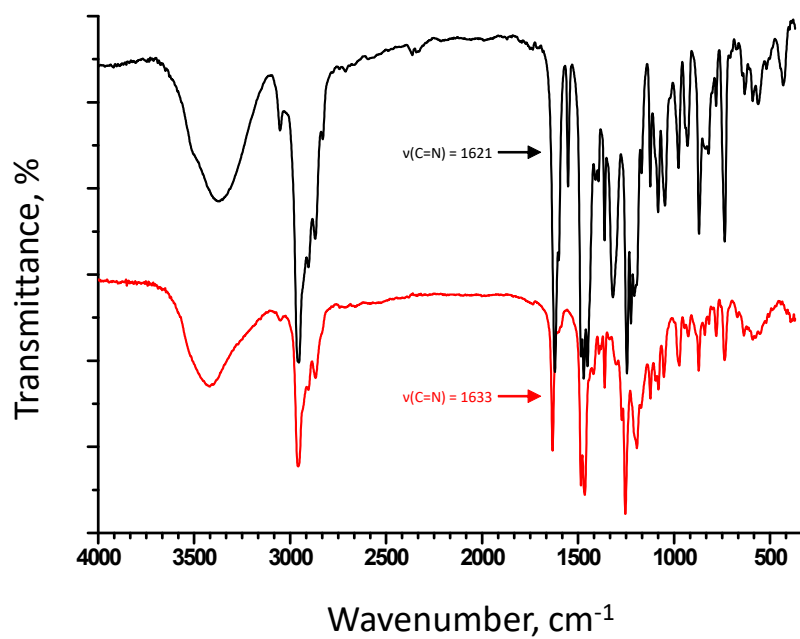

**b**

**Figure S13.** IR spectra for  $4_2\text{-Fe}_2$  exp (a, black line) and  $5_2\text{-Fe}_2$  exp (b, black line) in comparison with those for free ligands **4** and **5** (red lines), respectively.

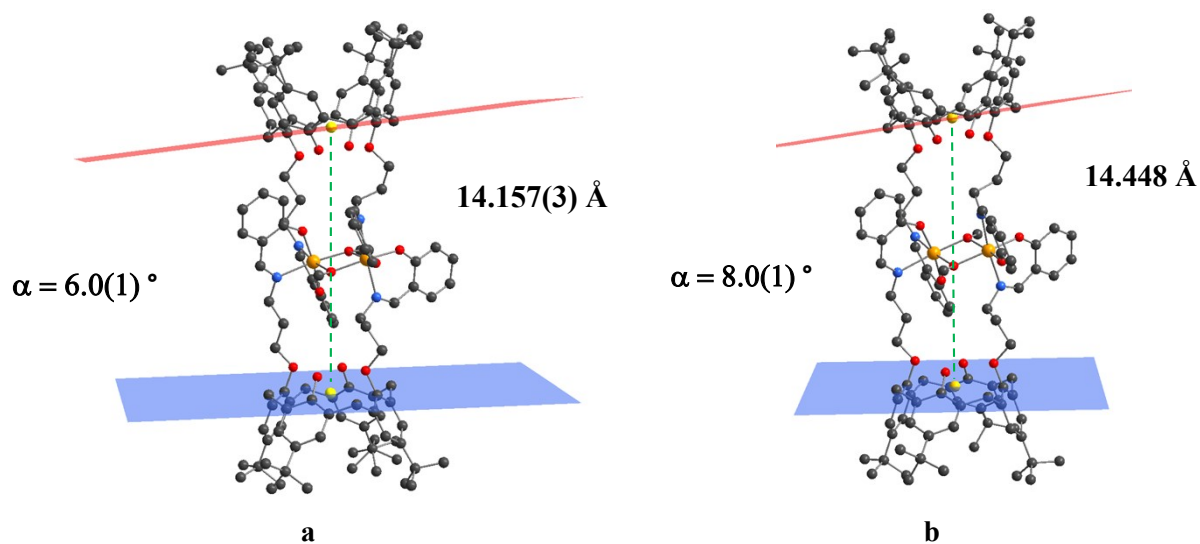

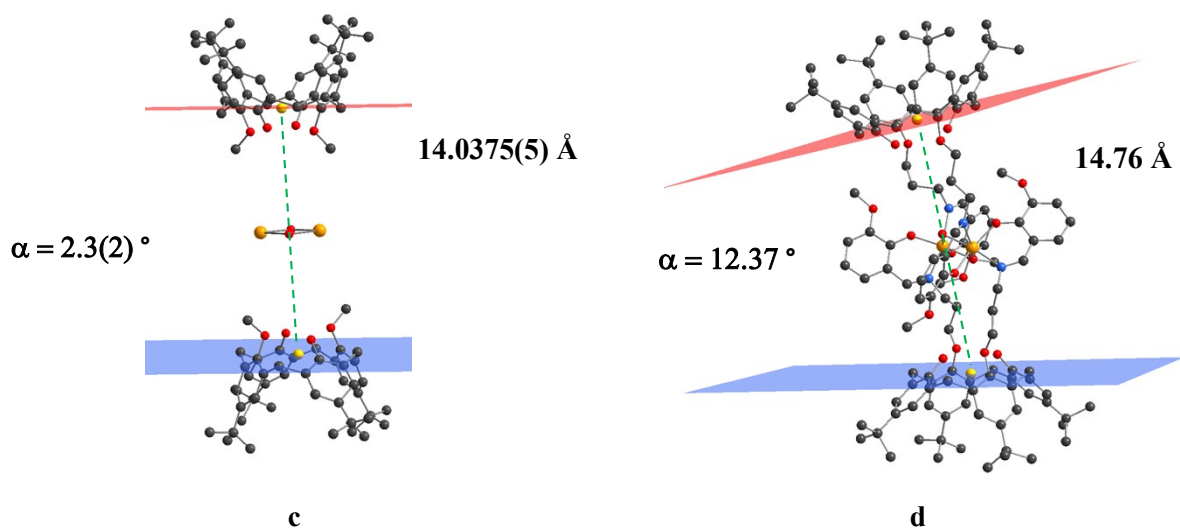

**Figure S14.** The dihedral angle ( $\alpha$ , $^\circ$ ) between the planes, passing through four CH<sub>2</sub>-bridges of macrocyclic platform, belonging to adjacent calix[4]arene ligands, and the distance (denoted as green dashed line, Å) between the C4-centroids (yellow spheres), built on four C-atoms belonging to CH<sub>2</sub>-bridges of adjacent calix[4]arene ligands, observed for **4**<sub>2</sub>-Fe<sub>2</sub> *exp* (a), **5**<sub>2</sub>-Fe<sub>2</sub> *exp* (b), **4**<sub>2</sub>-Fe<sub>2</sub> *sim* (c), **5**<sub>2</sub>-Fe<sub>2</sub> *sim* (d). Dark grey, red, goldish, and blue spheres represent C-, O-, Fe- and N-atoms, The disordered atoms, H-atoms and solvent molecules are omitted for clarity.

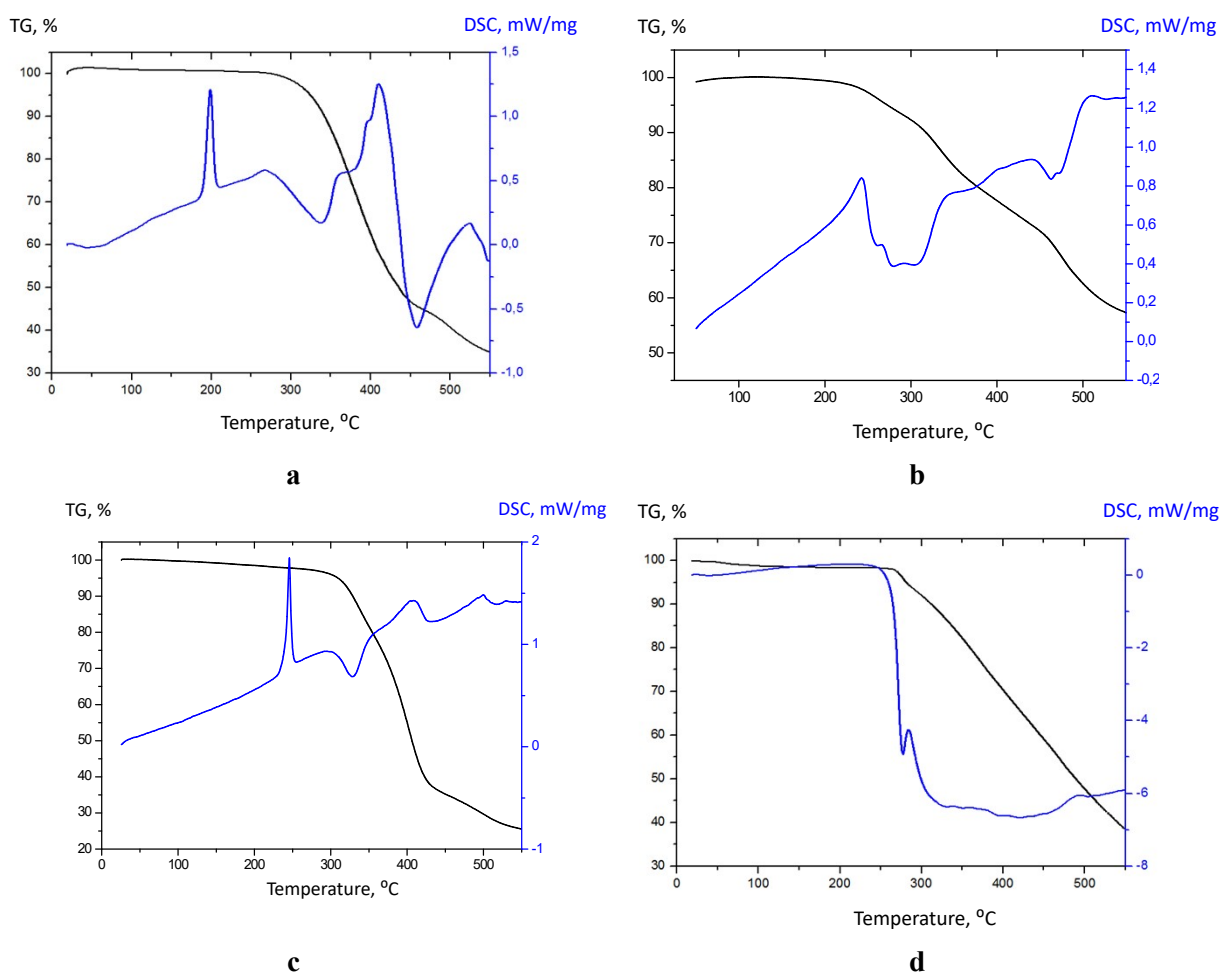

**Figure S15.** The TGA/DSC traces for samples of **4** (a), **4**<sub>2</sub>-Fe<sub>2</sub> *exp* (b), **5** (c) and **5**<sub>2</sub>-Fe<sub>2</sub> *exp* (d). Whereas for air-dried sample of **4**<sub>2</sub>-Fe<sub>2</sub> *exp* the TGA/DSC analysis revealed the absence of any

solvate molecules, the total mass loss of 1.50% in the temperature range of 25-260°C, observed for  $5_2\text{-Fe}_2$  exp, may be consistent with the presence of *ca* 1 molecule of MeOH per one complex molecule.

**Table S2.** The coordination bond lengths and angles for  $4_2\text{-Fe}_2$  exp (established by SCXRD),  $4_2\text{-Fe}_2$  sim,  $5_2\text{-Fe}_2$  sim (obtained based on DFT/B3LYP – calculations).

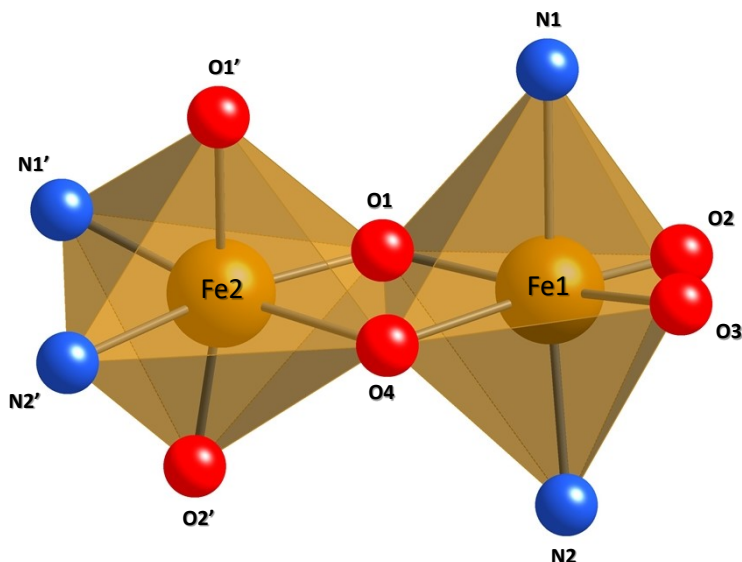

|                                             | $N_{x,y}/O_{x,y}$                           | $4_2\text{-Fe}_2$ exp | $4_2\text{-Fe}_2$ sim | $5_2\text{-Fe}_2$ sim |
|---------------------------------------------|---------------------------------------------|-----------------------|-----------------------|-----------------------|
| d (Fe1...N <sub>x</sub> ), Å                | N1                                          | 2.181(7)              | 2.2321                | 2.0570                |
|                                             | N2                                          | 2.150(6)              | 2.2190                | 2.3150                |
| d (Fe1...O <sub>x</sub> ), Å                | O1                                          | 2.001(5)              | 2.0745                | 2.0810                |
|                                             | O2                                          | 1.929(5)              | 1.9616                | 1.9719                |
|                                             | O3                                          | 1.957(6)              | 1.9596                | 1.9620                |
|                                             | O4                                          | 2.021(5)              | 2.0710                | 2.0914                |
| d (Fe2...N <sub>x</sub> ), Å                | N1'                                         | 2.175(7)              | 2.2840                | 2.1556                |
|                                             | N2'                                         | 2.183(7)              | 2.2784                | 2.2200                |
| d (Fe2...O <sub>x</sub> ), Å                | O1'                                         | 1.952(5)              | 1.9572                | 1.9595                |
|                                             | O1                                          | 1.995(5)              | 2.0229                | 2.0398                |
|                                             | O4                                          | 2.010(5)              | 2.0281                | 2.0359                |
|                                             | O2'                                         | 1.946(6)              | 1.9586                | 1.9698                |
| ∠ N <sub>x</sub> – Fe1 – N <sub>y</sub> , ° | N1/N2                                       | 176.1(3)              | 171.61                | 163.32                |
|                                             | N1/O1                                       | 85.9(2)               | 89.12                 | 86.20                 |
| ∠ N <sub>x</sub> – Fe1 – O <sub>y</sub> , ° | N1/O2                                       | 90.0(2)               | 90.36                 | 93.04                 |
|                                             | N1/O3                                       | 84.7(2)               | 83.94                 | 86.78                 |
|                                             | N1/O4                                       | 97.2(2)               | 96.94                 | 98.58                 |
|                                             | O1/N2                                       | 96.2(2)               | 97.92                 | 110.09                |
|                                             | O2/N2                                       | 86.5(2)               | 84.78                 | 81.89                 |
|                                             | O3/N2                                       | 93.9(2)               | 90.03                 | 78.13                 |
|                                             | O4/N2                                       | 86.5(2)               | 89.26                 | 89.71                 |
|                                             | ∠ O <sub>x</sub> – Fe1 – O <sub>y</sub> , ° | O1/O2                 | 95.3(2)               | 92.72                 |
| O1/O3                                       |                                             | 163.8(2)              | 166.59                | 165.31                |
| O1/O4                                       |                                             | 75.1(2)               | 75.62                 | 73.95                 |
| O2/O3                                       |                                             | 97.9(2)               | 98.77                 | 96.86                 |
| O2/O4                                       |                                             | 167.4(2)              | 166.07                | 164.24                |
|                                             | O3/O4                                       | 92.9(2)               | 93.80                 | 94.40                 |

|                                                           |         |          |        |        |
|-----------------------------------------------------------|---------|----------|--------|--------|
| $\angle \mathbf{N}_x - \text{Fe2} - \mathbf{N}_y, ^\circ$ | N1'/N2' | 92.2(3)  | 89.41  | 99.40  |
|                                                           | O1'/N1' | 88.1(2)  | 88.22  | 79.96  |
|                                                           | O1'/N2' | 86.1(2)  | 83.92  | 89.39  |
|                                                           | N1'/O1  | 96.8(2)  | 96.99  | 102.73 |
| $\angle \mathbf{N}_x - \text{Fe2} - \mathbf{O}_y, ^\circ$ | N1'/O4  | 170.8(2) | 174.65 | 171.19 |
|                                                           | N1'/O2' | 85.9(3)  | 83.80  | 85.91  |
|                                                           | O1/N2'  | 170.7(2) | 173.59 | 156.63 |
|                                                           | O4/N2'  | 95.8(2)  | 95.90  | 83.24  |
|                                                           | N2'/O2' | 88.6(3)  | 88.73  | 83.39  |
|                                                           | O1'/O1  | 96.8(2)  | 96.63  | 101.73 |
| $\angle \mathbf{O}_x - \text{Fe2} - \mathbf{O}_y, ^\circ$ | O1'/O4  | 87.8(2)  | 91.69  | 91.71  |
|                                                           | O1'/O2' | 171.8(2) | 169.21 | 162.87 |
|                                                           | O1/O4   | 75.5(2)  | 77.71  | 76.01  |
|                                                           | O1/O2'  | 89.4(2)  | 91.56  | 90.73  |
|                                                           | O4/O2'  | 99.0(2)  | 96.93  | 102.78 |

**Table S3.** SHAPE<sup>1</sup> analysis of coordination polyhedrons for **4<sub>2</sub>-Fe<sub>2</sub><sub>exp</sub>** (established by SCXRD), **4<sub>2</sub>-Fe<sub>2</sub><sub>sim</sub>**, **5<sub>2</sub>-Fe<sub>2</sub><sub>sim</sub>** (obtained based on DFT/B3LYP – calculations).

| Complex name                                      | Fe  | HP-6   | PPY-6  | OC-6  | TPR-6  | JPPY-6 |
|---------------------------------------------------|-----|--------|--------|-------|--------|--------|
| <b>4<sub>2</sub>-Fe<sub>2</sub><sub>exp</sub></b> | Fe1 | 31.639 | 23.065 | 1.229 | 11.535 | 26.615 |
|                                                   | Fe2 | 29.428 | 24.358 | 1.091 | 12.650 | 28.564 |
| <b>4<sub>2</sub>-Fe<sub>2</sub><sub>sim</sub></b> | Fe1 | 32.303 | 23.829 | 1.344 | 11.021 | 27.117 |
|                                                   | Fe2 | 29.605 | 26.008 | 1.044 | 14.025 | 30.125 |
| <b>5<sub>2</sub>-Fe<sub>2</sub><sub>sim</sub></b> | Fe1 | 29.704 | 20.994 | 2.591 | 9.179  | 24.301 |
|                                                   | Fe2 | 33.219 | 20.867 | 2.427 | 9.471  | 25.235 |

| Label  | Symmetry        | Shape                           |
|--------|-----------------|---------------------------------|
| HP-6   | D <sub>6h</sub> | Hexagon                         |
| PPY-6  | C <sub>5v</sub> | Pentagonal pyramid              |
| OC-6   | O <sub>h</sub>  | Octahedron                      |
| TPR-6  | D <sub>3h</sub> | Trigonal prism                  |
| JPPY-6 | C <sub>5v</sub> | Johnson pentagonal pyramid (J2) |

**Table S4.** The dihedral angles between the opposite aryl moieties (A-C and B-D) of macrocycle platform for **4<sub>2</sub>-Fe<sub>2</sub><sub>exp</sub>**, **5<sub>2</sub>-Fe<sub>2</sub><sub>exp</sub>** (both established by SCXRD), **4<sub>2</sub>-Fe<sub>2</sub><sub>sim</sub>**, **5<sub>2</sub>-Fe<sub>2</sub><sub>sim</sub>** (both obtained based on DFT/B3LYP – calculations).

|                             | <b>4<sub>2</sub>-Fe<sub>2</sub><sub>exp</sub></b> | <b>4<sub>2</sub>-Fe<sub>2</sub><sub>sim</sub></b> | <b>5<sub>2</sub>-Fe<sub>2</sub><sub>exp</sub></b> | <b>5<sub>2</sub>-Fe<sub>2</sub><sub>sim</sub></b> |
|-----------------------------|---------------------------------------------------|---------------------------------------------------|---------------------------------------------------|---------------------------------------------------|
| $\angle \text{A-C}, ^\circ$ | 45.7(3)                                           | 37.24                                             | 42.2(6)                                           | 38.95                                             |
|                             | 46.2(6)                                           | 38.04                                             |                                                   | 39.33                                             |
| $\angle \text{B-D}, ^\circ$ | 70.7(3)                                           | 86.23                                             | 81.3(3)                                           | 86.22                                             |
|                             | 72.6(7)                                           | 89.07                                             |                                                   | 88.21                                             |
| $\Delta, ^\circ$            | 25.0(3)                                           | 48.99                                             | 39.1(6)                                           | 47.27                                             |
|                             | 26.4(6)                                           | 51.03                                             |                                                   | 48.88                                             |

**Table S5.** The Fe...Fe distances observed for **4<sub>2</sub>-Fe<sub>2</sub><sub>exp</sub>**, **5<sub>2</sub>-Fe<sub>2</sub><sub>exp</sub>** (both established by SCXRD), **4<sub>2</sub>-Fe<sub>2</sub><sub>sim</sub>**, **5<sub>2</sub>-Fe<sub>2</sub><sub>sim</sub>** (both obtained based on DFT/B3LYP – calculations).

|                | <b>4<sub>2</sub>-Fe<sub>2</sub><sub>exp</sub></b> | <b>4<sub>2</sub>-Fe<sub>2</sub><sub>sim</sub></b> | <b>5<sub>2</sub>-Fe<sub>2</sub><sub>exp</sub></b> | <b>5<sub>2</sub>-Fe<sub>2</sub><sub>sim</sub></b> |
|----------------|---------------------------------------------------|---------------------------------------------------|---------------------------------------------------|---------------------------------------------------|
| d (Fe...Fe), Å | 3.175(2)                                          | 3.215                                             | 3.354(6)                                          | 3.272                                             |

**Table S6.** Optimized geometries in Cartesian coordinates for **4**, obtained by DFT-B3LYP calculations.

| Center Number | Atomic Number | Atomic Type | Coordinates (Angstroms) |           |           |
|---------------|---------------|-------------|-------------------------|-----------|-----------|
|               |               |             | X                       | Y         | Z         |
| 1             | 8             | 0           | -3.749977               | 4.459356  | 3.872938  |
| 2             | 8             | 0           | -8.234138               | -0.512470 | -0.495057 |
| 3             | 8             | 0           | -1.420741               | -1.494410 | -1.466058 |
| 4             | 8             | 0           | 0.358785                | 0.617133  | 2.472172  |
| 5             | 8             | 0           | -0.377205               | 1.155881  | -0.187521 |
| 6             | 1             | 0           | -0.122951               | 1.091005  | 0.752762  |
| 7             | 7             | 0           | -6.226983               | -2.067443 | -1.691256 |
| 8             | 8             | 0           | 0.093538                | -1.887718 | 1.265157  |
| 9             | 1             | 0           | 0.191492                | -1.086079 | 1.813250  |
| 10            | 7             | 0           | -2.976219               | 2.224936  | 2.682796  |
| 11            | 6             | 0           | 2.237788                | 2.019073  | 1.851262  |
| 12            | 6             | 0           | -7.002977               | -3.024043 | -1.362439 |
| 13            | 1             | 0           | -6.723500               | -4.072264 | -1.577509 |
| 14            | 6             | 0           | 0.319580                | -0.501011 | -2.811850 |
| 15            | 6             | 0           | 1.899973                | -2.768444 | -2.419855 |
| 16            | 1             | 0           | 2.511861                | -3.640954 | -2.215286 |
| 17            | 6             | 0           | -8.900431               | -1.679254 | -0.279453 |
| 18            | 6             | 0           | 0.657533                | -2.684688 | -1.774367 |
| 19            | 6             | 0           | 0.386721                | 2.049660  | -0.882009 |
| 20            | 6             | 0           | 1.748577                | 0.835504  | 2.426875  |
| 21            | 6             | 0           | 1.565959                | -0.631724 | -3.429834 |
| 22            | 1             | 0           | 1.920951                | 0.201039  | -4.032532 |
| 23            | 6             | 0           | 2.370279                | -1.771889 | -3.281092 |
| 24            | 6             | 0           | -3.642884               | 5.044116  | 2.662872  |
| 25            | 6             | 0           | -0.157082               | -1.569511 | -2.027454 |
| 26            | 6             | 0           | -0.313649               | 1.064130  | 3.684341  |
| 27            | 1             | 0           | -0.385614               | 2.157610  | 3.659697  |
| 28            | 1             | 0           | 0.305803                | 0.777487  | 4.541801  |
| 29            | 6             | 0           | 3.624494                | 2.184564  | 1.795792  |
| 30            | 1             | 0           | 4.003842                | 3.102407  | 1.354207  |
| 31            | 6             | 0           | 2.599951                | -0.178643 | 2.883930  |
| 32            | 6             | 0           | 4.525172                | 1.218205  | 2.270885  |
| 33            | 6             | 0           | -3.784805               | -1.843196 | -1.556230 |
| 34            | 1             | 0           | -3.945555               | -0.772532 | -1.385632 |
| 35            | 1             | 0           | -3.734875               | -2.321562 | -0.570086 |
| 36            | 6             | 0           | -4.974713               | -2.407971 | -2.345112 |
| 37            | 1             | 0           | -4.992056               | -1.949220 | -3.344541 |
| 38            | 1             | 0           | -4.860247               | -3.499862 | -2.484720 |
| 39            | 6             | 0           | 2.103992                | -2.651622 | 2.414352  |
| 40            | 6             | 0           | -1.688972               | 0.417890  | 3.775912  |
| 41            | 1             | 0           | -2.116369               | 0.712037  | 4.743802  |
| 42            | 1             | 0           | -1.579915               | -0.674052 | 3.790571  |
| 43            | 6             | 0           | -3.236042               | 4.314995  | 1.512236  |
| 44            | 6             | 0           | -2.460681               | -2.047173 | -2.280751 |
| 45            | 1             | 0           | -2.264494               | -3.116502 | -2.458349 |
| 46            | 1             | 0           | -2.471085               | -1.546203 | -3.261796 |
| 47            | 6             | 0           | 3.982067                | 0.041508  | 2.799581  |
| 48            | 1             | 0           | 4.636026                | -0.747549 | 3.155268  |
| 49            | 6             | 0           | -8.308842               | -2.896821 | -0.695363 |
| 50            | 6             | 0           | -2.922387               | 2.893076  | 1.582771  |
| 51            | 1             | 0           | -2.628926               | 2.406268  | 0.642562  |



|     |   |   |            |           |           |
|-----|---|---|------------|-----------|-----------|
| 52  | 6 | 0 | 1.187307   | 3.020793  | -0.262036 |
| 53  | 6 | 0 | 0.310672   | 1.964884  | -2.286296 |
| 54  | 6 | 0 | -0.447372  | 0.814776  | -2.934246 |
| 55  | 1 | 0 | -1.428588  | 0.701354  | -2.466911 |
| 56  | 1 | 0 | -0.607250  | 1.054002  | -3.993259 |
| 57  | 6 | 0 | 2.227480   | -4.734474 | 0.553778  |
| 58  | 1 | 0 | 2.255577   | -5.526567 | -0.188381 |
| 59  | 6 | 0 | 1.145860   | -2.745881 | 1.387431  |
| 60  | 6 | 0 | -10.154392 | -1.688435 | 0.346854  |
| 61  | 1 | 0 | -10.595795 | -0.743597 | 0.661287  |
| 62  | 6 | 0 | 3.095793   | -3.636555 | 2.488773  |
| 63  | 1 | 0 | 3.818398   | -3.561753 | 3.298948  |
| 64  | 6 | 0 | 1.322864   | 3.088335  | 1.255977  |
| 65  | 1 | 0 | 1.730092   | 4.071275  | 1.517179  |
| 66  | 1 | 0 | 0.332731   | 3.041703  | 1.722242  |
| 67  | 6 | 0 | -2.676111  | 0.798980  | 2.661126  |
| 68  | 1 | 0 | -2.306579  | 0.475312  | 1.677512  |
| 69  | 1 | 0 | -3.613013  | 0.256766  | 2.847048  |
| 70  | 6 | 0 | 3.179202   | -4.705389 | 1.583961  |
| 71  | 6 | 0 | 0.270285   | -3.759941 | -0.760239 |
| 72  | 1 | 0 | -0.751713  | -3.580317 | -0.418055 |
| 73  | 1 | 0 | 0.296359   | -4.747605 | -1.237951 |
| 74  | 6 | 0 | -3.943500  | 6.409638  | 2.549215  |
| 75  | 1 | 0 | -4.253734  | 6.946506  | 3.440811  |
| 76  | 6 | 0 | 1.223617   | -3.768351 | 0.426339  |
| 77  | 6 | 0 | 0.996278   | 2.912833  | -3.045664 |
| 78  | 1 | 0 | 0.913032   | 2.846277  | -4.128527 |
| 79  | 6 | 0 | -9.023425  | -4.085093 | -0.453432 |
| 80  | 1 | 0 | -8.573971  | -5.024110 | -0.769766 |
| 81  | 6 | 0 | 4.207973   | -6.855854 | 0.648577  |
| 82  | 1 | 0 | 3.252362   | -7.393363 | 0.663030  |
| 83  | 1 | 0 | 5.003392   | -7.593959 | 0.807319  |
| 84  | 1 | 0 | 4.347396   | -6.432103 | -0.353134 |
| 85  | 6 | 0 | 6.042063   | 1.475780  | 2.189387  |
| 86  | 6 | 0 | 1.869628   | 3.941417  | -1.073772 |
| 87  | 1 | 0 | 2.469910   | 4.696402  | -0.575267 |
| 88  | 6 | 0 | 3.716621   | -1.870546 | -4.024212 |
| 89  | 6 | 0 | -10.836209 | -2.884107 | 0.569284  |
| 90  | 1 | 0 | -11.807661 | -2.863668 | 1.056382  |
| 91  | 6 | 0 | 2.080263   | -1.509552 | 3.425901  |
| 92  | 1 | 0 | 2.705856   | -1.798284 | 4.277962  |
| 93  | 1 | 0 | 1.067444   | -1.384843 | 3.825810  |
| 94  | 6 | 0 | 4.276457   | -5.775276 | 1.745764  |
| 95  | 6 | 0 | 1.783243   | 3.927396  | -2.469830 |
| 96  | 6 | 0 | 6.392177   | 2.751582  | 2.993872  |
| 97  | 1 | 0 | 5.875782   | 3.635633  | 2.604168  |
| 98  | 1 | 0 | 7.470773   | 2.947456  | 2.945087  |
| 99  | 1 | 0 | 6.114415   | 2.639385  | 4.048806  |
| 100 | 6 | 0 | -3.142585  | 4.988801  | 0.278235  |
| 101 | 1 | 0 | -2.826689  | 4.426379  | -0.598096 |
| 102 | 6 | 0 | -10.269956 | -4.096798 | 0.167597  |
| 103 | 1 | 0 | -10.791200 | -5.034588 | 0.335761  |
| 104 | 6 | 0 | -3.842059  | 7.046675  | 1.315838  |
| 105 | 1 | 0 | -4.078701  | 8.105519  | 1.243554  |
| 106 | 6 | 0 | 4.645065   | -0.714360 | -3.579420 |
| 107 | 1 | 0 | 4.205682   | 0.266074  | -3.791719 |
| 108 | 1 | 0 | 5.606724   | -0.771818 | -4.106220 |

|     |   |   |           |           |           |
|-----|---|---|-----------|-----------|-----------|
| 109 | 1 | 0 | 4.841828  | -0.764671 | -2.501962 |
| 110 | 6 | 0 | -3.440580 | 6.341759  | 0.169995  |
| 111 | 1 | 0 | -3.363354 | 6.846364  | -0.788534 |
| 112 | 6 | 0 | 4.445729  | -3.200161 | -3.748051 |
| 113 | 1 | 0 | 4.693531  | -3.318247 | -2.686657 |
| 114 | 1 | 0 | 5.386224  | -3.227851 | -4.311530 |
| 115 | 1 | 0 | 3.848170  | -4.065625 | -4.058853 |
| 116 | 6 | 0 | 3.473049  | -1.768689 | -5.549676 |
| 117 | 1 | 0 | 2.827886  | -2.584138 | -5.898356 |
| 118 | 1 | 0 | 4.424489  | -1.829757 | -6.094048 |
| 119 | 1 | 0 | 2.992454  | -0.822958 | -5.822835 |
| 120 | 6 | 0 | 2.497174  | 4.956793  | -3.367364 |
| 121 | 6 | 0 | 3.337531  | 5.962329  | -2.556187 |
| 122 | 1 | 0 | 2.721580  | 6.544757  | -1.860696 |
| 123 | 1 | 0 | 3.822619  | 6.670731  | -3.238315 |
| 124 | 1 | 0 | 4.127691  | 5.464351  | -1.981324 |
| 125 | 6 | 0 | 5.672689  | -5.110166 | 1.673064  |
| 126 | 1 | 0 | 5.815511  | -4.604447 | 0.710623  |
| 127 | 1 | 0 | 6.463546  | -5.863568 | 1.783548  |
| 128 | 1 | 0 | 5.810615  | -4.365552 | 2.464868  |
| 129 | 6 | 0 | 6.453666  | 1.674829  | 0.710245  |
| 130 | 1 | 0 | 6.221381  | 0.784055  | 0.115163  |
| 131 | 1 | 0 | 7.532799  | 1.860917  | 0.638662  |
| 132 | 1 | 0 | 5.937467  | 2.525402  | 0.252311  |
| 133 | 6 | 0 | 4.120302  | -6.477375 | 3.117036  |
| 134 | 1 | 0 | 4.205156  | -5.768662 | 3.948422  |
| 135 | 1 | 0 | 4.897599  | -7.241525 | 3.248709  |
| 136 | 1 | 0 | 3.142853  | -6.968113 | 3.195843  |
| 137 | 6 | 0 | 6.868774  | 0.308173  | 2.763017  |
| 138 | 1 | 0 | 6.647997  | 0.131280  | 3.822615  |
| 139 | 1 | 0 | 7.936853  | 0.542445  | 2.684456  |
| 140 | 1 | 0 | 6.696171  | -0.625311 | 2.214693  |
| 141 | 6 | 0 | 1.445429  | 5.755239  | -4.176100 |
| 142 | 1 | 0 | 0.834038  | 5.098841  | -4.804928 |
| 143 | 1 | 0 | 0.769541  | 6.300676  | -3.506591 |
| 144 | 1 | 0 | 1.938300  | 6.484582  | -4.832205 |
| 145 | 6 | 0 | 3.446060  | 4.228472  | -4.350140 |
| 146 | 1 | 0 | 4.203817  | 3.650795  | -3.807481 |
| 147 | 1 | 0 | 3.963795  | 4.953638  | -4.991546 |
| 148 | 1 | 0 | 2.903780  | 3.536713  | -5.003900 |
| 149 | 1 | 0 | -3.508410 | 3.495499  | 3.762607  |
| 150 | 1 | 0 | -8.765121 | 0.224944  | -0.153289 |

---

**Table S7.** Optimized geometries in Cartesian coordinates for **5**, obtained by DFT-B3LYP calculations.

| Center Number | Atomic Number | Atomic Type | Coordinates (Angstroms) |           |           |
|---------------|---------------|-------------|-------------------------|-----------|-----------|
|               |               |             | X                       | Y         | Z         |
| 1             | 8             | 0           | 3.693036                | 4.461535  | -3.068730 |
| 2             | 8             | 0           | 7.695082                | -1.456400 | 0.868574  |
| 3             | 8             | 0           | 0.770867                | -1.899667 | 1.515335  |
| 4             | 8             | 0           | -0.606411               | 0.704122  | -2.295860 |
| 5             | 8             | 0           | -0.029902               | 0.923610  | 0.449815  |
| 6             | 1             | 0           | -0.210772               | 0.979876  | -0.507756 |
| 7             | 7             | 0           | 5.491487                | -2.922473 | 1.871061  |
| 8             | 8             | 0           | -0.576672               | -1.918796 | -1.327545 |
| 9             | 1             | 0           | -0.587793               | -1.064168 | -1.798898 |
| 10            | 7             | 0           | 2.795429                | 2.148749  | -2.153898 |
| 11            | 6             | 0           | -2.437857               | 2.153105  | -1.641843 |
| 12            | 6             | 0           | 6.184839                | -3.919061 | 1.481783  |
| 13            | 1             | 0           | 5.801200                | -4.949884 | 1.596295  |
| 14            | 6             | 0           | -0.995363               | -0.924503 | 2.841260  |
| 15            | 6             | 0           | -2.680041               | -3.031613 | 2.121240  |
| 16            | 1             | 0           | -3.327810               | -3.836462 | 1.789186  |
| 17            | 6             | 0           | 8.218303                | -2.671989 | 0.579668  |
| 18            | 6             | 0           | -1.391279               | -2.971409 | 1.571318  |
| 19            | 6             | 0           | -0.776550               | 1.800681  | 1.182478  |
| 20            | 6             | 0           | -1.981472               | 1.003743  | -2.306833 |
| 21            | 6             | 0           | -2.289251               | -1.028180 | 3.358586  |
| 22            | 1             | 0           | -2.635476               | -0.234850 | 4.016900  |
| 23            | 6             | 0           | -3.149814               | -2.090810 | 3.043378  |
| 24            | 6             | 0           | 3.555927                | 4.912788  | -1.809189 |
| 25            | 6             | 0           | -0.529749               | -1.943385 | 1.987275  |
| 26            | 6             | 0           | 0.161473                | 1.224412  | -3.419004 |
| 27            | 1             | 0           | 0.284706                | 2.305329  | -3.286155 |
| 28            | 1             | 0           | -0.416000               | 1.052316  | -4.334373 |
| 29            | 6             | 0           | -3.814018               | 2.397725  | -1.645869 |
| 30            | 1             | 0           | -4.167249               | 3.288888  | -1.133299 |
| 31            | 6             | 0           | -2.859220               | 0.096137  | -2.913975 |
| 32            | 6             | 0           | -4.736884               | 1.541411  | -2.266774 |
| 33            | 6             | 0           | 3.088594                | -2.461133 | 1.672534  |
| 34            | 1             | 0           | 3.348276                | -1.398802 | 1.600259  |
| 35            | 1             | 0           | 3.043329                | -2.850620 | 0.647843  |
| 36            | 6             | 0           | 4.188601                | -3.193093 | 2.454439  |
| 37            | 1             | 0           | 4.206420                | -2.815720 | 3.487311  |
| 38            | 1             | 0           | 3.969710                | -4.277037 | 2.502105  |
| 39            | 6             | 0           | -2.541624               | -2.438009 | -2.674658 |
| 40            | 6             | 0           | 1.507225                | 0.517424  | -3.493001 |
| 41            | 1             | 0           | 2.006252                | 0.877090  | -4.402772 |
| 42            | 1             | 0           | 1.348454                | -0.561376 | -3.617729 |
| 43            | 6             | 0           | 3.080677                | 4.095403  | -0.756960 |
| 44            | 6             | 0           | 1.719086                | -2.605936 | 2.323305  |
| 45            | 1             | 0           | 1.425582                | -3.664791 | 2.400823  |
| 46            | 1             | 0           | 1.723566                | -2.188993 | 3.343031  |
| 47            | 6             | 0           | -4.229230               | 0.392871  | -2.885295 |
| 48            | 1             | 0           | -4.903490               | -0.313470 | -3.358195 |
| 49            | 6             | 0           | 7.518365                | -3.859698 | 0.862080  |
| 50            | 6             | 0           | 2.720444                | 2.702034  | -0.993173 |
| 51            | 1             | 0           | 2.371640                | 2.133278  | -0.120423 |

|     |   |   |           |           |           |
|-----|---|---|-----------|-----------|-----------|
| 52  | 6 | 0 | -1.468528 | 2.881755  | 0.616274  |
| 53  | 6 | 0 | -0.800630 | 1.575443  | 2.573185  |
| 54  | 6 | 0 | -0.160394 | 0.318434  | 3.144932  |
| 55  | 1 | 0 | 0.841147  | 0.186056  | 2.728542  |
| 56  | 1 | 0 | -0.057814 | 0.440755  | 4.230713  |
| 57  | 6 | 0 | -2.911343 | -4.681820 | -1.047810 |
| 58  | 1 | 0 | -3.035962 | -5.538986 | -0.393122 |
| 59  | 6 | 0 | -1.663860 | -2.693007 | -1.604253 |
| 60  | 6 | 0 | 9.496521  | -2.738407 | -0.022427 |
| 61  | 6 | 0 | -3.579351 | -3.346785 | -2.912284 |
| 62  | 1 | 0 | -4.238384 | -3.149060 | -3.755127 |
| 63  | 6 | 0 | -1.502724 | 3.101553  | -0.892821 |
| 64  | 1 | 0 | -1.835988 | 4.128452  | -1.078980 |
| 65  | 1 | 0 | -0.489392 | 3.037901  | -1.303723 |
| 66  | 6 | 0 | 2.441412  | 0.742130  | -2.293248 |
| 67  | 1 | 0 | 2.002505  | 0.338802  | -1.369284 |
| 68  | 1 | 0 | 3.365901  | 0.179920  | -2.482089 |
| 69  | 6 | 0 | -3.785591 | -4.491672 | -2.128356 |
| 70  | 6 | 0 | -0.998301 | -3.966379 | 0.480072  |
| 71  | 1 | 0 | 0.053400  | -3.820513 | 0.222341  |
| 72  | 1 | 0 | -1.113631 | -4.992160 | 0.853124  |
| 73  | 6 | 0 | 3.904620  | 6.260942  | -1.540083 |
| 74  | 6 | 0 | -1.865766 | -3.798226 | -0.759355 |
| 75  | 6 | 0 | -1.472330 | 2.491958  | 3.381647  |
| 76  | 1 | 0 | -1.468507 | 2.314616  | 4.455141  |
| 77  | 6 | 0 | 8.130418  | -5.087738 | 0.527561  |
| 78  | 1 | 0 | 7.592229  | -6.007467 | 0.743732  |
| 79  | 6 | 0 | -5.005101 | -6.650982 | -1.485897 |
| 80  | 1 | 0 | -4.084856 | -7.247199 | -1.488348 |
| 81  | 1 | 0 | -5.829268 | -7.315302 | -1.772300 |
| 82  | 1 | 0 | -5.193725 | -6.315989 | -0.458966 |
| 83  | 6 | 0 | -6.240144 | 1.877899  | -2.233292 |
| 84  | 6 | 0 | -2.137373 | 3.769152  | 1.474902  |
| 85  | 1 | 0 | -2.647963 | 4.612665  | 1.020419  |
| 86  | 6 | 0 | -4.553545 | -2.160236 | 3.675110  |
| 87  | 6 | 0 | 10.080433 | -3.959338 | -0.342071 |
| 88  | 1 | 0 | 11.061443 | -4.001364 | -0.803112 |
| 89  | 6 | 0 | -2.383201 | -1.204959 | -3.559137 |
| 90  | 1 | 0 | -2.966881 | -1.366378 | -4.472249 |
| 91  | 1 | 0 | -1.340187 | -1.107248 | -3.881622 |
| 92  | 6 | 0 | -4.927533 | -5.468591 | -2.471497 |
| 93  | 6 | 0 | -2.146586 | 3.613731  | 2.864944  |
| 94  | 6 | 0 | -6.476625 | 3.262062  | -2.884982 |
| 95  | 1 | 0 | -5.938934 | 4.059172  | -2.360218 |
| 96  | 1 | 0 | -7.544589 | 3.513223  | -2.865843 |
| 97  | 1 | 0 | -6.145069 | 3.265787  | -3.930300 |
| 98  | 6 | 0 | 2.957523  | 4.629889  | 0.545123  |
| 99  | 1 | 0 | 2.586869  | 3.990875  | 1.342830  |
| 100 | 6 | 0 | 9.385146  | -5.145391 | -0.061896 |
| 101 | 1 | 0 | 9.834031  | -6.102986 | -0.308807 |
| 102 | 6 | 0 | 3.774018  | 6.762307  | -0.246253 |
| 103 | 1 | 0 | 4.038839  | 7.792311  | -0.033604 |
| 104 | 6 | 0 | -5.371684 | -0.912883 | 3.260857  |
| 105 | 1 | 0 | -4.888343 | 0.016129  | 3.581626  |
| 106 | 1 | 0 | -6.372654 | -0.944098 | 3.711262  |
| 107 | 1 | 0 | -5.487983 | -0.868016 | 2.171504  |
| 108 | 6 | 0 | 3.299900  | 5.946775  | 0.797756  |

|     |   |   |           |           |           |
|-----|---|---|-----------|-----------|-----------|
| 109 | 1 | 0 | 3.205620  | 6.359350  | 1.797973  |
| 110 | 6 | 0 | -5.336654 | -3.412375 | 3.234004  |
| 111 | 1 | 0 | -5.507986 | -3.427547 | 2.151333  |
| 112 | 1 | 0 | -6.318333 | -3.423379 | 3.723032  |
| 113 | 1 | 0 | -4.817491 | -4.337403 | 3.512384  |
| 114 | 6 | 0 | -4.425809 | -2.196704 | 5.217450  |
| 115 | 1 | 0 | -3.854167 | -3.074687 | 5.541834  |
| 116 | 1 | 0 | -5.418700 | -2.244927 | 5.683593  |
| 117 | 1 | 0 | -3.918390 | -1.306672 | 5.605227  |
| 118 | 6 | 0 | -2.851586 | 4.598106  | 3.818194  |
| 119 | 6 | 0 | -3.521917 | 5.765860  | 3.067997  |
| 120 | 1 | 0 | -2.794332 | 6.358335  | 2.500453  |
| 121 | 1 | 0 | -4.005119 | 6.437385  | 3.787849  |
| 122 | 1 | 0 | -4.296461 | 5.417074  | 2.374262  |
| 123 | 6 | 0 | -6.285285 | -4.725741 | -2.429904 |
| 124 | 1 | 0 | -6.472233 | -4.308215 | -1.433364 |
| 125 | 1 | 0 | -7.106414 | -5.413259 | -2.671500 |
| 126 | 1 | 0 | -6.321152 | -3.900536 | -3.149851 |
| 127 | 6 | 0 | -6.724897 | 1.914700  | -0.763211 |
| 128 | 1 | 0 | -6.573164 | 0.944779  | -0.275410 |
| 129 | 1 | 0 | -7.795257 | 2.153612  | -0.721888 |
| 130 | 1 | 0 | -6.191329 | 2.669530  | -0.175659 |
| 131 | 6 | 0 | -4.709071 | -6.045329 | -3.891763 |
| 132 | 1 | 0 | -4.692921 | -5.256770 | -4.652358 |
| 133 | 1 | 0 | -5.515522 | -6.743720 | -4.151455 |
| 134 | 1 | 0 | -3.757103 | -6.586172 | -3.951912 |
| 135 | 6 | 0 | -7.091856 | 0.841593  | -2.992189 |
| 136 | 1 | 0 | -6.814281 | 0.780270  | -4.051396 |
| 137 | 1 | 0 | -8.148435 | 1.130255  | -2.945145 |
| 138 | 1 | 0 | -7.005605 | -0.159692 | -2.554417 |
| 139 | 6 | 0 | -1.819059 | 5.196102  | 4.804959  |
| 140 | 1 | 0 | -1.332504 | 4.419209  | 5.404850  |
| 141 | 1 | 0 | -1.035063 | 5.742451  | 4.267135  |
| 142 | 1 | 0 | -2.309074 | 5.893878  | 5.496526  |
| 143 | 6 | 0 | -3.947002 | 3.854473  | 4.620757  |
| 144 | 1 | 0 | -4.704109 | 3.430505  | 3.950281  |
| 145 | 1 | 0 | -4.450236 | 4.542687  | 5.312409  |
| 146 | 1 | 0 | -3.529227 | 3.033311  | 5.213339  |
| 147 | 1 | 0 | 3.413967  | 3.501789  | -3.067393 |
| 148 | 1 | 0 | 8.342865  | -0.785968 | 0.584608  |
| 149 | 8 | 0 | 10.057996 | -1.500565 | -0.240868 |
| 150 | 6 | 0 | 11.339667 | -1.431767 | -0.854166 |
| 151 | 1 | 0 | 12.097317 | -1.932700 | -0.238414 |
| 152 | 1 | 0 | 11.320415 | -1.880143 | -1.855476 |
| 153 | 1 | 0 | 11.576470 | -0.369572 | -0.933308 |
| 154 | 8 | 0 | 4.352906  | 6.970609  | -2.615630 |
| 155 | 6 | 0 | 4.724618  | 8.325618  | -2.418204 |
| 156 | 1 | 0 | 3.875124  | 8.928048  | -2.068223 |
| 157 | 1 | 0 | 5.554111  | 8.414151  | -1.703314 |
| 158 | 1 | 0 | 5.048023  | 8.688328  | -3.395563 |

---

**Table S8.** Optimized geometries in Cartesian coordinates for  $4_2\text{-Fe}_2\text{sim}$ , obtained by DFT-B3LYP calculations.

| Center Number | Atomic Number | Atomic Type | Coordinates (Angstroms) |           |           |
|---------------|---------------|-------------|-------------------------|-----------|-----------|
|               |               |             | X                       | Y         | Z         |
| 1             | 26            | 0           | -0.045899               | -0.145384 | -1.942346 |
| 2             | 26            | 0           | 0.047530                | 0.036899  | 1.265982  |
| 3             | 8             | 0           | -0.736811               | -1.082344 | -0.225392 |
| 4             | 8             | 0           | 6.001011                | 0.064046  | -2.222169 |
| 5             | 8             | 0           | 5.857866                | 0.556592  | 2.269629  |
| 6             | 8             | 0           | -0.729314               | -1.568660 | -3.106481 |
| 7             | 8             | 0           | 0.741728                | 0.977970  | -0.390966 |
| 8             | 8             | 0           | 0.527509                | 1.120806  | -3.323648 |
| 9             | 8             | 0           | -1.449248               | 1.288409  | 1.420218  |
| 10            | 8             | 0           | 1.548386                | -1.203180 | 1.479685  |
| 11            | 8             | 0           | 6.388488                | 1.944057  | -0.269026 |
| 12            | 1             | 0           | 6.234634                | 1.337390  | -1.026124 |
| 13            | 8             | 0           | 6.089438                | -1.388420 | 0.328767  |
| 14            | 1             | 0           | 5.979317                | -0.760077 | 1.075566  |
| 15            | 8             | 0           | -5.649325               | -0.559241 | 2.425660  |
| 16            | 8             | 0           | -6.165512               | -0.190515 | -2.023122 |
| 17            | 8             | 0           | -6.031297               | 1.418458  | 0.230661  |
| 18            | 1             | 0           | -6.071582               | 0.924589  | -0.611533 |
| 19            | 7             | 0           | -0.852886               | -1.143138 | 3.001910  |
| 20            | 8             | 0           | -6.408743               | -2.075116 | 0.012260  |
| 21            | 1             | 0           | -6.324847               | -1.492135 | -0.766593 |
| 22            | 7             | 0           | 1.891829                | -1.212927 | -2.114648 |
| 23            | 7             | 0           | 1.051003                | 1.429819  | 2.763981  |
| 24            | 7             | 0           | -1.993438               | 0.934394  | -2.095350 |
| 25            | 6             | 0           | 9.181539                | 1.856646  | 3.180426  |
| 26            | 1             | 0           | 9.712608                | 2.801751  | 3.142258  |
| 27            | 6             | 0           | 9.101482                | -0.489132 | 3.640001  |
| 28            | 1             | 0           | 9.574514                | -1.410092 | 3.972574  |
| 29            | 6             | 0           | 7.303966                | -0.226395 | -2.620245 |
| 30            | 6             | 0           | 7.791312                | -1.541546 | -2.535035 |
| 31            | 6             | 0           | 9.449417                | 0.551367  | -3.390272 |
| 32            | 1             | 0           | 10.077750               | 1.384042  | -3.689121 |
| 33            | 6             | 0           | 8.133857                | 0.837978  | -3.002136 |
| 34            | 6             | 0           | 7.864686                | 1.838298  | 2.696336  |
| 35            | 6             | 0           | 7.786102                | -0.562444 | 3.175998  |
| 36            | 6             | 0           | 7.409508                | -3.111843 | -0.571564 |
| 37            | 6             | 0           | -1.671330               | 2.470893  | 1.927856  |
| 38            | 6             | 0           | 9.822714                | 0.714831  | 3.673725  |
| 39            | 6             | 0           | 9.110504                | -1.772597 | -2.937114 |
| 40            | 1             | 0           | 9.484103                | -2.791529 | -2.873537 |
| 41            | 6             | 0           | 6.961382                | -2.690479 | -1.966371 |
| 42            | 1             | 0           | 5.908819                | -2.402091 | -1.939400 |
| 43            | 1             | 0           | 7.050164                | -3.555256 | -2.635566 |
| 44            | 6             | 0           | 9.961846                | -0.751124 | -3.386877 |
| 45            | 6             | 0           | 7.661751                | 2.288162  | -2.935727 |
| 46            | 1             | 0           | 6.573160                | 2.336309  | -3.047949 |
| 47            | 1             | 0           | 8.081921                | 2.830497  | -3.790178 |
| 48            | 6             | 0           | 8.080840                | 3.018431  | -1.662932 |
| 49            | 6             | 0           | 11.266267               | 0.731702  | 4.212665  |
| 50            | 6             | 0           | 7.167170                | 0.624190  | 2.745405  |
| 51            | 6             | 0           | 7.888740                | 3.446102  | 0.734906  |

|     |   |   |           |           |           |
|-----|---|---|-----------|-----------|-----------|
| 52  | 6 | 0 | 11.401430 | -1.084602 | -3.824176 |
| 53  | 6 | 0 | 8.263167  | -4.206773 | -0.392897 |
| 54  | 1 | 0 | 8.550868  | -4.766868 | -1.277557 |
| 55  | 6 | 0 | -7.972442 | 1.288071  | -2.663117 |
| 56  | 6 | 0 | 12.178266 | -1.686884 | -2.628077 |
| 57  | 1 | 0 | 12.226639 | -0.975533 | -1.795280 |
| 58  | 1 | 0 | 13.205303 | -1.934577 | -2.926162 |
| 59  | 1 | 0 | 11.707524 | -2.603244 | -2.255980 |
| 60  | 6 | 0 | 9.120041  | 3.961186  | -1.712514 |
| 61  | 1 | 0 | 9.581111  | 4.140216  | -2.679105 |
| 62  | 6 | 0 | 4.980943  | 0.050686  | -3.244060 |
| 63  | 1 | 0 | 4.921841  | -0.960035 | -3.672198 |
| 64  | 1 | 0 | 5.264606  | 0.741768  | -4.049956 |
| 65  | 6 | 0 | 6.991561  | -2.383486 | 0.557132  |
| 66  | 6 | 0 | -0.284465 | -2.174101 | 3.539400  |
| 67  | 1 | 0 | -0.786125 | -2.646054 | 4.396443  |
| 68  | 6 | 0 | 9.554671  | 4.675111  | -0.590757 |
| 69  | 6 | 0 | 7.270537  | 3.105886  | 2.085684  |
| 70  | 1 | 0 | 6.190412  | 2.990415  | 1.974217  |
| 71  | 1 | 0 | 7.447509  | 3.944852  | 2.770259  |
| 72  | 6 | 0 | 8.915078  | 4.384186  | 0.626620  |
| 73  | 1 | 0 | 9.221882  | 4.904626  | 1.531726  |
| 74  | 6 | 0 | 7.473924  | -2.717176 | 1.839343  |
| 75  | 6 | 0 | -7.496571 | 0.866786  | 3.083836  |
| 76  | 6 | 0 | 7.449531  | 2.780776  | -0.428996 |
| 77  | 6 | 0 | 8.335475  | -3.812746 | 1.959069  |
| 78  | 1 | 0 | 8.685127  | -4.067037 | 2.957578  |
| 79  | 6 | 0 | 3.671303  | 0.473735  | -2.595954 |
| 80  | 1 | 0 | 2.927438  | 0.658563  | -3.376772 |
| 81  | 1 | 0 | 3.835650  | 1.433733  | -2.091827 |
| 82  | 6 | 0 | -0.726763 | 3.137876  | 2.771242  |
| 83  | 6 | 0 | -9.093394 | -1.405331 | 3.389469  |
| 84  | 1 | 0 | -9.702328 | -2.300895 | 3.462829  |
| 85  | 6 | 0 | 0.528360  | 2.545082  | 3.164611  |
| 86  | 1 | 0 | 1.082372  | 3.129430  | 3.913182  |
| 87  | 6 | 0 | -2.904046 | 3.124665  | 1.662386  |
| 88  | 1 | 0 | -3.629517 | 2.605531  | 1.042994  |
| 89  | 6 | 0 | 4.811220  | 0.790988  | 3.229929  |
| 90  | 1 | 0 | 5.103035  | 1.631779  | 3.872956  |
| 91  | 1 | 0 | 4.697441  | -0.097523 | 3.869138  |
| 92  | 6 | 0 | 1.825378  | -2.287413 | 2.153953  |
| 93  | 6 | 0 | 10.666425 | 5.740418  | -0.646473 |
| 94  | 6 | 0 | -7.774585 | -1.555825 | 2.936879  |
| 95  | 6 | 0 | 7.085067  | -1.914861 | 3.077136  |
| 96  | 1 | 0 | 5.998617  | -1.781794 | 3.107051  |
| 97  | 1 | 0 | 7.344478  | -2.508458 | 3.960888  |
| 98  | 6 | 0 | -6.934750 | 2.437376  | 0.292437  |
| 99  | 6 | 0 | 3.522623  | 1.089960  | 2.469158  |
| 100 | 1 | 0 | 3.387954  | 0.350749  | 1.675908  |
| 101 | 1 | 0 | 3.598950  | 2.075848  | 1.994917  |
| 102 | 6 | 0 | -7.461957 | -0.014751 | -2.538995 |
| 103 | 6 | 0 | -8.816858 | 0.959997  | 3.532711  |
| 104 | 1 | 0 | -9.215996 | 1.954633  | 3.718428  |
| 105 | 6 | 0 | -9.638413 | -0.161327 | 3.723010  |
| 106 | 6 | 0 | 0.080167  | 2.232477  | -3.844164 |
| 107 | 6 | 0 | 8.742148  | -4.593205 | 0.865984  |
| 108 | 6 | 0 | -3.175176 | 4.380174  | 2.183415  |

|     |   |   |            |           |           |
|-----|---|---|------------|-----------|-----------|
| 109 | 1 | 0 | -4.128441  | 4.852761  | 1.956919  |
| 110 | 6 | 0 | -6.958639  | -0.414517 | 2.842067  |
| 111 | 6 | 0 | -5.076975  | -0.340821 | -2.986939 |
| 112 | 1 | 0 | -4.954008  | 0.610463  | -3.520609 |
| 113 | 1 | 0 | -5.375285  | -1.104139 | -3.714125 |
| 114 | 6 | 0 | -9.278349  | 1.430319  | -3.140275 |
| 115 | 1 | 0 | -9.670994  | 2.438964  | -3.240947 |
| 116 | 6 | 0 | 1.035252   | -3.189814 | -3.298787 |
| 117 | 6 | 0 | -8.242133  | -1.146418 | -2.812502 |
| 118 | 6 | 0 | -10.088254 | 0.334192  | -3.475461 |
| 119 | 6 | 0 | 2.032728   | -2.392160 | -2.622321 |
| 120 | 1 | 0 | 3.025561   | -2.859488 | -2.565882 |
| 121 | 6 | 0 | -3.334686  | -0.969859 | 2.745221  |
| 122 | 1 | 0 | -3.249223  | -0.384880 | 1.826635  |
| 123 | 1 | 0 | -3.369870  | -2.029194 | 2.461584  |
| 124 | 6 | 0 | -0.295625  | -2.724071 | -3.538370 |
| 125 | 6 | 0 | -0.926758  | -2.483565 | -0.145812 |
| 126 | 1 | 0 | -1.583524  | -2.818264 | -0.956545 |
| 127 | 1 | 0 | -1.391409  | -2.749239 | 0.811056  |
| 128 | 1 | 0 | 0.030071   | -3.016128 | -0.229066 |
| 129 | 6 | 0 | 3.100473   | -0.559221 | -1.588543 |
| 130 | 1 | 0 | 3.860873   | -1.311267 | -1.344752 |
| 131 | 1 | 0 | 2.816289   | -0.067219 | -0.660710 |
| 132 | 6 | 0 | -2.241728  | 5.044303  | 3.003726  |
| 133 | 1 | 0 | -2.463134  | 6.027242  | 3.408887  |
| 134 | 6 | 0 | -2.110543  | -0.702510 | 3.628116  |
| 135 | 1 | 0 | -2.030161  | 0.372015  | 3.821541  |
| 136 | 1 | 0 | -2.229684  | -1.203790 | 4.602017  |
| 137 | 6 | 0 | 0.960480   | 2.373516  | -0.487861 |
| 138 | 1 | 0 | 1.512953   | 2.603088  | -1.405736 |
| 139 | 1 | 0 | 1.547204   | 2.726426  | 0.368851  |
| 140 | 1 | 0 | 0.009393   | 2.922675  | -0.506729 |
| 141 | 6 | 0 | -8.198908  | -3.164372 | -1.227059 |
| 142 | 6 | 0 | -3.821777  | -0.755455 | -2.232054 |
| 143 | 1 | 0 | -3.087548  | -1.134284 | -2.950571 |
| 144 | 1 | 0 | -4.078296  | -1.597684 | -1.578382 |
| 145 | 6 | 0 | -1.214876  | 2.759742  | -3.542903 |
| 146 | 6 | 0 | -4.642308  | -0.587568 | 3.437950  |
| 147 | 1 | 0 | -4.912066  | -1.314687 | 4.219931  |
| 148 | 1 | 0 | -4.557407  | 0.400359  | 3.918007  |
| 149 | 6 | 0 | -9.544928  | -0.941900 | -3.289782 |
| 150 | 1 | 0 | -10.140735 | -1.822648 | -3.504669 |
| 151 | 6 | 0 | 0.959447   | -2.807108 | 3.167649  |
| 152 | 6 | 0 | -2.159198  | 2.063339  | -2.700981 |
| 153 | 1 | 0 | -3.132329  | 2.564131  | -2.598314 |
| 154 | 6 | 0 | -7.493678  | 3.037481  | -0.846359 |
| 155 | 6 | 0 | 11.279929  | 0.225632  | 5.675637  |
| 156 | 1 | 0 | 10.894010  | -0.796282 | 5.758856  |
| 157 | 1 | 0 | 10.666679  | 0.868244  | 6.318853  |
| 158 | 1 | 0 | 12.304236  | 0.227897  | 6.069884  |
| 159 | 6 | 0 | -7.255948  | 2.896089  | 1.585264  |
| 160 | 6 | 0 | 12.170104  | 0.158065  | -4.315120 |
| 161 | 1 | 0 | 11.681757  | 0.627674  | -5.177575 |
| 162 | 1 | 0 | 13.179906  | -0.134743 | -4.626403 |
| 163 | 1 | 0 | 12.275462  | 0.912985  | -3.527111 |
| 164 | 6 | 0 | -6.719630  | 2.153093  | 2.803189  |
| 165 | 1 | 0 | -5.663842  | 1.922596  | 2.652875  |



|     |   |   |            |           |           |
|-----|---|---|------------|-----------|-----------|
| 166 | 1 | 0 | -6.791615  | 2.815833  | 3.674675  |
| 167 | 6 | 0 | -9.046015  | -4.266941 | 1.198415  |
| 168 | 1 | 0 | -9.355153  | -4.677993 | 2.154596  |
| 169 | 6 | 0 | -7.524211  | -2.856901 | -0.030650 |
| 170 | 6 | 0 | 3.039323   | -2.978860 | 1.897364  |
| 171 | 1 | 0 | 3.700697   | -2.578249 | 1.134469  |
| 172 | 6 | 0 | -9.286331  | -4.042829 | -1.168413 |
| 173 | 1 | 0 | -9.786512  | -4.288490 | -2.103041 |
| 174 | 6 | 0 | -7.180394  | 2.527337  | -2.250828 |
| 175 | 1 | 0 | -7.408388  | 3.329028  | -2.962125 |
| 176 | 1 | 0 | -6.105792  | 2.334229  | -2.345003 |
| 177 | 6 | 0 | -1.042193  | 4.415603  | 3.292853  |
| 178 | 1 | 0 | -0.313544  | 4.907165  | 3.935810  |
| 179 | 6 | 0 | -3.155549  | 0.367758  | -1.398419 |
| 180 | 1 | 0 | -3.874840  | 1.163177  | -1.166707 |
| 181 | 1 | 0 | -2.797324  | -0.033516 | -0.452917 |
| 182 | 6 | 0 | 2.312658   | 1.042478  | 3.411726  |
| 183 | 1 | 0 | 2.192434   | 0.021948  | 3.791143  |
| 184 | 1 | 0 | 2.492903   | 1.694226  | 4.281937  |
| 185 | 6 | 0 | -9.730683  | -4.626130 | 0.027929  |
| 186 | 6 | 0 | 12.152015  | -0.194227 | 3.343479  |
| 187 | 1 | 0 | 11.795370  | -1.229820 | 3.355562  |
| 188 | 1 | 0 | 13.185172  | -0.191384 | 3.714284  |
| 189 | 1 | 0 | 12.162585  | 0.142069  | 2.300114  |
| 190 | 6 | 0 | -7.295184  | -2.937018 | 2.493529  |
| 191 | 1 | 0 | -6.210722  | -2.920148 | 2.364929  |
| 192 | 1 | 0 | -7.530766  | -3.669868 | 3.275464  |
| 193 | 6 | 0 | 11.247398  | 5.910841  | -2.064033 |
| 194 | 1 | 0 | 11.701247  | 4.983774  | -2.434501 |
| 195 | 1 | 0 | 12.030159  | 6.678893  | -2.051605 |
| 196 | 1 | 0 | 10.483985  | 6.230620  | -2.783333 |
| 197 | 6 | 0 | 11.367640  | -2.112416 | -4.981245 |
| 198 | 1 | 0 | 10.881353  | -3.047543 | -4.683051 |
| 199 | 1 | 0 | 12.387811  | -2.355952 | -5.304840 |
| 200 | 1 | 0 | 10.822914  | -1.712979 | -5.845169 |
| 201 | 6 | 0 | -1.166730  | -3.565791 | -4.278895 |
| 202 | 1 | 0 | -2.172352  | -3.204124 | -4.473826 |
| 203 | 6 | 0 | 0.896499   | 2.962446  | -4.748117 |
| 204 | 1 | 0 | 1.873202   | 2.553129  | -4.989660 |
| 205 | 6 | 0 | -7.962623  | -3.381367 | 1.197271  |
| 206 | 6 | 0 | -8.098600  | 4.000951  | 1.705412  |
| 207 | 1 | 0 | -8.322724  | 4.358989  | 2.708202  |
| 208 | 6 | 0 | 11.826026  | 5.339406  | 0.297486  |
| 209 | 1 | 0 | 11.492862  | 5.251911  | 1.337500  |
| 210 | 1 | 0 | 12.624458  | 6.092293  | 0.266134  |
| 211 | 1 | 0 | 12.254852  | 4.374662  | 0.001280  |
| 212 | 6 | 0 | 1.334325   | -3.978501 | 3.867211  |
| 213 | 1 | 0 | 0.664459   | -4.358524 | 4.637152  |
| 214 | 6 | 0 | -11.243644 | -6.155621 | 1.418998  |
| 215 | 1 | 0 | -10.396804 | -6.697072 | 1.857281  |
| 216 | 1 | 0 | -12.085341 | -6.855781 | 1.355176  |
| 217 | 1 | 0 | -11.533415 | -5.354978 | 2.109873  |
| 218 | 6 | 0 | -11.514799 | 0.567302  | -4.008520 |
| 219 | 6 | 0 | -8.349236  | 4.136516  | -0.668219 |
| 220 | 1 | 0 | -8.759738  | 4.599502  | -1.560481 |
| 221 | 6 | 0 | 11.886206  | 2.142839  | 4.192069  |
| 222 | 1 | 0 | 12.904532  | 2.102542  | 4.596805  |

|     |   |   |            |           |           |
|-----|---|---|------------|-----------|-----------|
| 223 | 1 | 0 | 11.314877  | 2.849025  | 4.806612  |
| 224 | 1 | 0 | 11.952535  | 2.547328  | 3.175404  |
| 225 | 6 | 0 | -11.076919 | 0.014020  | 4.246207  |
| 226 | 6 | 0 | 10.097325  | 7.108641  | -0.197371 |
| 227 | 1 | 0 | 9.282853   | 7.429129  | -0.857973 |
| 228 | 1 | 0 | 10.880629  | 7.877638  | -0.222781 |
| 229 | 1 | 0 | 9.701731   | 7.069099  | 0.823611  |
| 230 | 6 | 0 | 1.424740   | -4.460046 | -3.780398 |
| 231 | 1 | 0 | 2.441422   | -4.797952 | -3.585661 |
| 232 | 6 | 0 | 3.370234   | -4.129729 | 2.596769  |
| 233 | 1 | 0 | 4.306070   | -4.636354 | 2.371115  |
| 234 | 6 | 0 | -7.754898  | -2.573247 | -2.562391 |
| 235 | 1 | 0 | -8.147285  | -3.210143 | -3.363008 |
| 236 | 1 | 0 | -6.663589  | -2.625474 | -2.642926 |
| 237 | 6 | 0 | -10.913999 | -5.613834 | 0.014099  |
| 238 | 6 | 0 | -8.662098  | 4.653975  | 0.593416  |
| 239 | 6 | 0 | -11.451118 | 1.417270  | -5.301059 |
| 240 | 1 | 0 | -10.988925 | 2.394865  | -5.125885 |
| 241 | 1 | 0 | -12.462212 | 1.592016  | -5.689949 |
| 242 | 1 | 0 | -10.870885 | 0.906726  | -6.079031 |
| 243 | 6 | 0 | -1.623401  | 3.980629  | -4.125873 |
| 244 | 1 | 0 | -2.611869  | 4.366588  | -3.881120 |
| 245 | 6 | 0 | 2.517346   | -4.644891 | 3.592245  |
| 246 | 1 | 0 | 2.783934   | -5.546225 | 4.136233  |
| 247 | 6 | 0 | 0.464416   | 4.156817  | -5.304221 |
| 248 | 1 | 0 | 1.117344   | 4.692247  | -5.990160 |
| 249 | 6 | 0 | -0.752115  | -4.806545 | -4.738627 |
| 250 | 1 | 0 | -1.447525  | -5.427017 | -5.299828 |
| 251 | 6 | 0 | 0.552339   | -5.271889 | -4.488459 |
| 252 | 1 | 0 | 0.871124   | -6.245626 | -4.848298 |
| 253 | 6 | 0 | -11.888438 | 0.883833  | 3.255348  |
| 254 | 1 | 0 | -11.442775 | 1.875572  | 3.124343  |
| 255 | 1 | 0 | -12.914723 | 1.022750  | 3.620086  |
| 256 | 1 | 0 | -11.937734 | 0.408121  | 2.268669  |
| 257 | 6 | 0 | -0.803243  | 4.684549  | -4.993489 |
| 258 | 1 | 0 | -1.134230  | 5.622063  | -5.430310 |
| 259 | 6 | 0 | -11.811650 | -1.330782 | 4.411026  |
| 260 | 1 | 0 | -11.913719 | -1.860897 | 3.456823  |
| 261 | 1 | 0 | -12.822147 | -1.152845 | 4.798281  |
| 262 | 1 | 0 | -11.298189 | -1.993133 | 5.118364  |
| 263 | 6 | 0 | -11.043936 | 0.711676  | 5.627889  |
| 264 | 1 | 0 | -10.482378 | 0.112731  | 6.355046  |
| 265 | 1 | 0 | -12.062927 | 0.848170  | 6.013008  |
| 266 | 1 | 0 | -10.572665 | 1.699216  | 5.574766  |
| 267 | 6 | 0 | -9.569436  | 5.883317  | 0.796256  |
| 268 | 6 | 0 | -10.098955 | 6.449249  | -0.535967 |
| 269 | 1 | 0 | -9.285455  | 6.779380  | -1.193133 |
| 270 | 1 | 0 | -10.736585 | 7.319564  | -0.339830 |
| 271 | 1 | 0 | -10.703641 | 5.713829  | -1.080148 |
| 272 | 6 | 0 | -12.178551 | -4.907410 | -0.533228 |
| 273 | 1 | 0 | -12.451069 | -4.050376 | 0.094256  |
| 274 | 1 | 0 | -13.029120 | -5.601420 | -0.551479 |
| 275 | 1 | 0 | -12.028079 | -4.538619 | -1.553957 |
| 276 | 6 | 0 | -12.347258 | 1.320062  | -2.941950 |
| 277 | 1 | 0 | -12.415186 | 0.739213  | -2.014716 |
| 278 | 1 | 0 | -13.366044 | 1.495591  | -3.310181 |
| 279 | 1 | 0 | -11.909739 | 2.293184  | -2.694051 |

|     |   |   |            |           |           |
|-----|---|---|------------|-----------|-----------|
| 280 | 6 | 0 | -10.575399 | -6.821559 | -0.893463 |
| 281 | 1 | 0 | -10.377338 | -6.512588 | -1.925758 |
| 282 | 1 | 0 | -11.411165 | -7.533167 | -0.912576 |
| 283 | 1 | 0 | -9.686493  | -7.348477 | -0.526690 |
| 284 | 6 | 0 | -12.241594 | -0.750950 | -4.340324 |
| 285 | 1 | 0 | -11.715268 | -1.325824 | -5.111787 |
| 286 | 1 | 0 | -13.245217 | -0.530071 | -4.722370 |
| 287 | 1 | 0 | -12.360150 | -1.387925 | -3.456052 |
| 288 | 6 | 0 | -8.772245  | 7.004059  | 1.507806  |
| 289 | 1 | 0 | -8.397340  | 6.677968  | 2.484168  |
| 290 | 1 | 0 | -7.909662  | 7.313747  | 0.905527  |
| 291 | 1 | 0 | -9.407869  | 7.884325  | 1.670677  |
| 292 | 6 | 0 | -10.789545 | 5.497794  | 1.667637  |
| 293 | 1 | 0 | -11.381203 | 4.710151  | 1.186199  |
| 294 | 1 | 0 | -11.440319 | 6.368330  | 1.821515  |
| 295 | 1 | 0 | -10.486338 | 5.131581  | 2.654592  |
| 296 | 6 | 0 | 8.962918   | -6.832423 | 2.011330  |
| 297 | 1 | 0 | 8.724828   | -6.396446 | 2.987920  |
| 298 | 1 | 0 | 9.610286   | -7.702482 | 2.182385  |
| 299 | 1 | 0 | 8.025471   | -7.187455 | 1.566646  |
| 300 | 6 | 0 | 9.662483   | -5.810688 | 1.081524  |
| 301 | 6 | 0 | 10.004539  | -6.528549 | -0.238723 |
| 302 | 1 | 0 | 9.107472   | -6.909935 | -0.740977 |
| 303 | 1 | 0 | 10.657139  | -7.385781 | -0.034054 |
| 304 | 1 | 0 | 10.535175  | -5.870217 | -0.936959 |
| 305 | 6 | 0 | 10.990176  | -5.357019 | 1.736008  |
| 306 | 1 | 0 | 11.517162  | -4.638770 | 1.096766  |
| 307 | 1 | 0 | 11.651346  | -6.218144 | 1.898907  |
| 308 | 1 | 0 | 10.822152  | -4.878426 | 2.707054  |

---

**Table S9.** Optimized geometries in Cartesian coordinates for  $\mathbf{5}_2\text{-Fe}_2\text{sim}$ , obtained by DFT-B3LYP calculations.

| Center Number | Atomic Number | Atomic Type | Coordinates (Angstroms) |           |           |
|---------------|---------------|-------------|-------------------------|-----------|-----------|
|               |               |             | X                       | Y         | Z         |
| 1             | 26            | 0           | -0.074337               | 0.062894  | 1.648066  |
| 2             | 26            | 0           | 0.045830                | -0.431700 | -1.537550 |
| 3             | 8             | 0           | -0.941658               | 0.625186  | -0.134677 |
| 4             | 8             | 0           | 5.994778                | -0.065070 | 2.009665  |
| 5             | 8             | 0           | 6.088993                | -0.107498 | -2.462090 |
| 6             | 8             | 0           | -0.777874               | 1.657641  | 2.532332  |
| 7             | 8             | 0           | 0.813737                | -1.138618 | 0.217014  |
| 8             | 8             | 0           | 0.527510                | -0.956381 | 3.205952  |
| 9             | 8             | 0           | -1.073929               | -2.048283 | -1.692360 |
| 10            | 8             | 0           | 1.217631                | 1.134311  | -1.854106 |
| 11            | 8             | 0           | 6.351229                | -1.803617 | -0.072380 |
| 12            | 1             | 0           | 6.199927                | -1.246167 | 0.723409  |
| 13            | 8             | 0           | 6.342187                | 1.604582  | -0.352693 |
| 14            | 1             | 0           | 6.206789                | 1.069916  | -1.166092 |
| 15            | 8             | 0           | -5.922088               | -0.350692 | -2.546273 |
| 16            | 8             | 0           | -6.197708               | 0.227382  | 1.850736  |
| 17            | 8             | 0           | -6.499032               | -1.754171 | -0.054657 |
| 18            | 1             | 0           | -6.373485               | -1.139875 | 0.695510  |
| 19            | 7             | 0           | -1.182475               | 0.444106  | -3.222590 |
| 20            | 8             | 0           | -6.231965               | 1.729477  | -0.505101 |
| 21            | 1             | 0           | -6.204390               | 1.284110  | 0.364341  |
| 22            | 7             | 0           | 1.873139                | 1.195591  | 1.695505  |
| 23            | 7             | 0           | 1.434031                | -1.544389 | -2.933615 |
| 24            | 7             | 0           | -1.969386               | -1.117225 | 1.966779  |
| 25            | 6             | 0           | 9.337030                | -1.559228 | -3.423596 |
| 26            | 1             | 0           | 9.800905                | -2.538966 | -3.466316 |
| 27            | 6             | 0           | 9.433170                | 0.818537  | -3.656378 |
| 28            | 1             | 0           | 9.975528                | 1.731140  | -3.891977 |
| 29            | 6             | 0           | 7.279140                | 0.090618  | 2.523465  |
| 30            | 6             | 0           | 7.861083                | 1.367250  | 2.601127  |
| 31            | 6             | 0           | 9.302321                | -0.911084 | 3.366016  |
| 32            | 1             | 0           | 9.847775                | -1.812284 | 3.626907  |
| 33            | 6             | 0           | 8.005051                | -1.062622 | 2.857923  |
| 34            | 6             | 0           | 8.012381                | -1.493651 | -2.964998 |
| 35            | 6             | 0           | 8.114078                | 0.940224  | -3.214241 |
| 36            | 6             | 0           | 7.729251                | 3.127253  | 0.767917  |
| 37            | 6             | 0           | -0.832921               | -3.300943 | -1.970542 |
| 38            | 6             | 0           | 10.069366               | -0.425297 | -3.792711 |
| 39            | 6             | 0           | 9.157362                | 1.462433  | 3.117168  |
| 40            | 1             | 0           | 9.601292                | 2.452738  | 3.182282  |
| 41            | 6             | 0           | 7.158014                | 2.621678  | 2.088225  |
| 42            | 1             | 0           | 6.092444                | 2.415171  | 1.968855  |
| 43            | 1             | 0           | 7.260551                | 3.415734  | 2.838194  |
| 44            | 6             | 0           | 9.899815                | 0.344300  | 3.527365  |
| 45            | 6             | 0           | 7.447697                | -2.462076 | 2.609792  |
| 46            | 1             | 0           | 6.353271                | -2.446167 | 2.644205  |
| 47            | 1             | 0           | 7.770652                | -3.116339 | 3.427228  |
| 48            | 6             | 0           | 7.916185                | -3.081533 | 1.295943  |
| 49            | 6             | 0           | 11.519451               | -0.495704 | -4.308971 |
| 50            | 6             | 0           | 7.400307                | -0.233400 | -2.915406 |
| 51            | 6             | 0           | 7.858405                | -3.256172 | -1.140465 |

|     |   |   |           |           |           |
|-----|---|---|-----------|-----------|-----------|
| 52  | 6 | 0 | 11.315726 | 0.530177  | 4.105931  |
| 53  | 6 | 0 | 8.675776  | 4.157894  | 0.739408  |
| 54  | 1 | 0 | 8.956016  | 4.606593  | 1.687601  |
| 55  | 6 | 0 | -8.187065 | -0.767043 | 2.812079  |
| 56  | 6 | 0 | 12.224910 | 1.202404  | 3.048393  |
| 57  | 1 | 0 | 12.295185 | 0.586427  | 2.144238  |
| 58  | 1 | 0 | 13.238009 | 1.339028  | 3.448417  |
| 59  | 1 | 0 | 11.847421 | 2.186834  | 2.751720  |
| 60  | 6 | 0 | 8.917104  | -4.065415 | 1.307798  |
| 61  | 1 | 0 | 9.310260  | -4.360593 | 2.275846  |
| 62  | 6 | 0 | 4.900268  | -0.083520 | 2.956790  |
| 63  | 1 | 0 | 4.804039  | 0.917354  | 3.401802  |
| 64  | 1 | 0 | 5.131040  | -0.793564 | 3.761549  |
| 65  | 6 | 0 | 7.323689  | 2.541756  | -0.445542 |
| 66  | 6 | 0 | -0.951810 | 1.604577  | -3.745510 |
| 67  | 1 | 0 | -1.623963 | 1.943801  | -4.546211 |
| 68  | 6 | 0 | 9.398890  | -4.676192 | 0.144810  |
| 69  | 6 | 0 | 7.323533  | -2.768897 | -2.482335 |
| 70  | 1 | 0 | 6.247891  | -2.602408 | -2.401441 |
| 71  | 1 | 0 | 7.482552  | -3.558322 | -3.227519 |
| 72  | 6 | 0 | 8.845813  | -4.239025 | -1.070981 |
| 73  | 1 | 0 | 9.190520  | -4.676860 | -2.005651 |
| 74  | 6 | 0 | 7.892651  | 2.960376  | -1.666179 |
| 75  | 6 | 0 | -8.020301 | -1.471372 | -2.943793 |
| 76  | 6 | 0 | 7.372677  | -2.693444 | 0.058272  |
| 77  | 6 | 0 | 8.844101  | 3.985989  | -1.635036 |
| 78  | 1 | 0 | 9.265553  | 4.305757  | -2.585826 |
| 79  | 6 | 0 | 3.642925  | -0.507100 | 2.213331  |
| 80  | 1 | 0 | 2.869876  | -0.750377 | 2.946503  |
| 81  | 1 | 0 | 3.870763  | -1.440524 | 1.685251  |
| 82  | 6 | 0 | 0.281120  | -3.716614 | -2.764766 |
| 83  | 6 | 0 | -9.163513 | 0.960945  | -3.698205 |
| 84  | 1 | 0 | -9.592434 | 1.925653  | -3.949705 |
| 85  | 6 | 0 | 1.274932  | -2.789945 | -3.248873 |
| 86  | 1 | 0 | 1.987071  | -3.232483 | -3.959281 |
| 87  | 6 | 0 | -1.702802 | -4.329656 | -1.489185 |
| 88  | 6 | 0 | 5.029668  | -0.309833 | -3.417480 |
| 89  | 1 | 0 | 5.332636  | -1.099009 | -4.117639 |
| 90  | 1 | 0 | 4.879767  | 0.615126  | -3.994756 |
| 91  | 6 | 0 | 1.110178  | 2.276141  | -2.473289 |
| 92  | 6 | 0 | 10.476839 | -5.777298 | 0.154922  |
| 93  | 6 | 0 | -7.828280 | 0.941448  | -3.269638 |
| 94  | 6 | 0 | 7.503858  | 2.321497  | -2.996863 |
| 95  | 1 | 0 | 6.412850  | 2.263557  | -3.081015 |
| 96  | 1 | 0 | 7.840681  | 2.984574  | -3.801634 |
| 97  | 6 | 0 | -7.568780 | -2.583652 | 0.100988  |
| 98  | 6 | 0 | 3.771965  | -0.704052 | -2.649459 |
| 99  | 1 | 0 | 3.547288  | 0.055007  | -1.895780 |
| 100 | 1 | 0 | 3.966007  | -1.646576 | -2.123992 |
| 101 | 6 | 0 | -7.473121 | 0.377979  | 2.421932  |
| 102 | 6 | 0 | -9.349168 | -1.394527 | -3.369225 |
| 103 | 1 | 0 | -9.934233 | -2.311331 | -3.362010 |
| 104 | 6 | 0 | -9.947392 | -0.194523 | -3.781370 |
| 105 | 6 | 0 | 0.194445  | -2.075515 | 3.794402  |
| 106 | 6 | 0 | 9.254753  | 4.617892  | -0.451099 |
| 107 | 6 | 0 | -1.480278 | -5.662906 | -1.800215 |
| 108 | 1 | 0 | -2.162929 | -6.402560 | -1.388806 |

|     |   |   |            |           |           |
|-----|---|---|------------|-----------|-----------|
| 109 | 6 | 0 | -7.241028  | -0.296348 | -2.950314 |
| 110 | 6 | 0 | -5.049335  | 0.378930  | 2.748687  |
| 111 | 1 | 0 | -4.997256  | -0.511013 | 3.389544  |
| 112 | 1 | 0 | -5.245033  | 1.247627  | 3.386230  |
| 113 | 6 | 0 | -9.467592  | -0.586323 | 3.342468  |
| 114 | 1 | 0 | -10.015338 | -1.474793 | 3.645871  |
| 115 | 6 | 0 | 0.977405   | 3.287374  | 2.640384  |
| 116 | 6 | 0 | -8.036724  | 1.659777  | 2.493200  |
| 117 | 6 | 0 | -10.062374 | 0.677230  | 3.479057  |
| 118 | 6 | 0 | 1.990932   | 2.422858  | 2.074636  |
| 119 | 1 | 0 | 2.977632   | 2.895094  | 1.980795  |
| 120 | 6 | 0 | -3.605981  | 0.012865  | -2.889475 |
| 121 | 1 | 0 | -3.501604  | -0.505769 | -1.932652 |
| 122 | 1 | 0 | -3.673342  | 1.083742  | -2.662529 |
| 123 | 6 | 0 | -0.357075  | 2.847433  | 2.860447  |
| 124 | 6 | 0 | 3.097299   | 0.537157  | 1.207639  |
| 125 | 1 | 0 | 3.862662   | 1.289355  | 0.982456  |
| 126 | 1 | 0 | 2.834788   | 0.050704  | 0.270854  |
| 127 | 6 | 0 | -0.401496  | -6.054475 | -2.613176 |
| 128 | 1 | 0 | -0.245711  | -7.102302 | -2.851699 |
| 129 | 6 | 0 | -2.366469  | -0.253791 | -3.755060 |
| 130 | 1 | 0 | -2.147972  | -1.323670 | -3.781234 |
| 131 | 1 | 0 | -2.549409  | 0.080125  | -4.788415 |
| 132 | 6 | 0 | 1.230620   | -2.471179 | 0.457482  |
| 133 | 1 | 0 | 1.731456   | -2.540046 | 1.428693  |
| 134 | 1 | 0 | 1.934410   | -2.798357 | -0.318578 |
| 135 | 1 | 0 | 0.374647   | -3.157495 | 0.462495  |
| 136 | 6 | 0 | -7.752078  | 3.311056  | 0.549130  |
| 137 | 6 | 0 | -3.788184  | 0.582585  | 1.923085  |
| 138 | 1 | 0 | -3.032187  | 1.039087  | 2.568200  |
| 139 | 1 | 0 | -3.999857  | 1.329015  | 1.148552  |
| 140 | 6 | 0 | -1.005933  | -2.783954 | 3.491606  |
| 141 | 6 | 0 | -4.910942  | -0.427948 | -3.551300 |
| 142 | 1 | 0 | -5.163536  | 0.222860  | -4.402080 |
| 143 | 1 | 0 | -4.840857  | -1.459755 | -3.934984 |
| 144 | 6 | 0 | -9.324579  | 1.780430  | 3.035240  |
| 145 | 1 | 0 | -9.751178  | 2.776489  | 3.090337  |
| 146 | 6 | 0 | 0.079943   | 2.557997  | -3.416722 |
| 147 | 6 | 0 | -2.019914  | -2.228764 | 2.620679  |
| 148 | 1 | 0 | -2.940131  | -2.824160 | 2.557769  |
| 149 | 6 | 0 | -8.143421  | -2.865882 | 1.349720  |
| 150 | 6 | 0 | 11.596622  | 0.133034  | -5.721662 |
| 151 | 1 | 0 | 11.283923  | 1.182940  | -5.719013 |
| 152 | 1 | 0 | 10.952462  | -0.406044 | -6.426765 |
| 153 | 1 | 0 | 12.625762  | 0.092519  | -6.101033 |
| 154 | 6 | 0 | -8.055002  | -3.191837 | -1.073664 |
| 155 | 6 | 0 | 11.965946  | -0.806913 | 4.512706  |
| 156 | 1 | 0 | 11.382599  | -1.328982 | 5.280652  |
| 157 | 1 | 0 | 12.963468  | -0.618702 | 4.927468  |
| 158 | 1 | 0 | 12.087615  | -1.480466 | 3.656285  |
| 159 | 6 | 0 | -7.477930  | -2.803156 | -2.430493 |
| 160 | 1 | 0 | -6.390098  | -2.744875 | -2.365549 |
| 161 | 1 | 0 | -7.726112  | -3.593088 | -3.150316 |
| 162 | 6 | 0 | -8.542475  | 4.083133  | -2.018853 |
| 163 | 1 | 0 | -8.833118  | 4.360804  | -3.027466 |
| 164 | 6 | 0 | -7.202859  | 2.681570  | -0.583709 |
| 165 | 6 | 0 | 2.078647   | 3.311237  | -2.229567 |

|     |   |   |            |           |           |
|-----|---|---|------------|-----------|-----------|
| 166 | 6 | 0 | -8.685691  | 4.334238  | 0.352753  |
| 167 | 1 | 0 | -9.087924  | 4.825598  | 1.236351  |
| 168 | 6 | 0 | -7.646639  | -2.182404 | 2.620504  |
| 169 | 1 | 0 | -7.959161  | -2.787619 | 3.478730  |
| 170 | 1 | 0 | -6.550863  | -2.174228 | 2.637132  |
| 171 | 6 | 0 | 0.461017   | -5.082721 | -3.088337 |
| 172 | 1 | 0 | 1.311377   | -5.363535 | -3.706938 |
| 173 | 6 | 0 | -3.192658  | -0.691015 | 1.272371  |
| 174 | 1 | 0 | -3.921921  | -1.513145 | 1.265856  |
| 175 | 1 | 0 | -2.916827  | -0.477806 | 0.241523  |
| 176 | 6 | 0 | 2.565833   | -0.866128 | -3.587847 |
| 177 | 1 | 0 | 2.224329   | 0.114748  | -3.928343 |
| 178 | 1 | 0 | 2.863038   | -1.441897 | -4.478781 |
| 179 | 6 | 0 | -9.096808  | 4.756870  | -0.920560 |
| 180 | 6 | 0 | 12.449327  | 0.287602  | -3.350313 |
| 181 | 1 | 0 | 12.164263  | 1.342554  | -3.276113 |
| 182 | 1 | 0 | 13.486564  | 0.246048  | -3.707114 |
| 183 | 1 | 0 | 12.418421  | -0.137650 | -2.340355 |
| 184 | 6 | 0 | -7.096629  | 2.270651  | -3.084305 |
| 185 | 1 | 0 | -6.025528  | 2.092436  | -2.970017 |
| 186 | 1 | 0 | -7.238458  | 2.888004  | -3.980268 |
| 187 | 6 | 0 | 10.950112  | -6.123116 | 1.580259  |
| 188 | 1 | 0 | 11.393996  | -5.256867 | 2.085155  |
| 189 | 1 | 0 | 11.716281  | -6.906457 | 1.534529  |
| 190 | 1 | 0 | 10.129665  | -6.499847 | 2.202676  |
| 191 | 6 | 0 | 11.246037  | 1.429758  | 5.364134  |
| 192 | 1 | 0 | 10.836257  | 2.419631  | 5.135541  |
| 193 | 1 | 0 | 12.249131  | 1.572965  | 5.786189  |
| 194 | 1 | 0 | 10.613012  | 0.975933  | 6.136127  |
| 195 | 6 | 0 | -1.265447  | 3.770945  | 3.480157  |
| 196 | 6 | 0 | 1.049761   | -2.628793 | 4.796443  |
| 197 | 6 | 0 | -7.616499  | 3.043567  | -1.877189 |
| 198 | 6 | 0 | -9.089326  | -4.120331 | -0.958047 |
| 199 | 1 | 0 | -9.442504  | -4.598185 | -1.869560 |
| 200 | 6 | 0 | 11.709389  | -5.308133 | -0.656376 |
| 201 | 1 | 0 | 11.450220  | -5.088963 | -1.698174 |
| 202 | 1 | 0 | 12.485042  | -6.085209 | -0.662301 |
| 203 | 1 | 0 | 12.140867  | -4.398593 | -0.221521 |
| 204 | 6 | 0 | 0.033374   | 3.809180  | -4.084348 |
| 205 | 1 | 0 | -0.764703  | 3.990440  | -4.801110 |
| 206 | 6 | 0 | -10.433000 | 6.229585  | -2.535633 |
| 207 | 1 | 0 | -9.541582  | 6.538094  | -3.094819 |
| 208 | 1 | 0 | -11.154105 | 7.054423  | -2.583967 |
| 209 | 1 | 0 | -10.880503 | 5.370793  | -3.049866 |
| 210 | 6 | 0 | -11.475512 | 0.801915  | 4.079509  |
| 211 | 6 | 0 | -9.191289  | -3.798424 | 1.408126  |
| 212 | 1 | 0 | -9.611889  | -4.017513 | 2.384981  |
| 213 | 6 | 0 | 12.041077  | -1.943123 | -4.402957 |
| 214 | 1 | 0 | 13.069105  | -1.938711 | -4.784401 |
| 215 | 1 | 0 | 11.437789  | -2.551399 | -5.087639 |
| 216 | 1 | 0 | 12.054996  | -2.437829 | -3.424873 |
| 217 | 6 | 0 | -11.408278 | -0.186554 | -4.271459 |
| 218 | 6 | 0 | 9.910095   | -7.068034 | -0.485169 |
| 219 | 1 | 0 | 9.039386   | -7.430681 | 0.074015  |
| 220 | 1 | 0 | 10.669394  | -7.861107 | -0.487893 |
| 221 | 1 | 0 | 9.595652   | -6.903762 | -1.521697 |
| 222 | 6 | 0 | 1.369167   | 4.597748  | 3.006501  |

|     |   |   |            |           |           |
|-----|---|---|------------|-----------|-----------|
| 223 | 1 | 0 | 2.396357   | 4.907031  | 2.824577  |
| 224 | 6 | 0 | 1.996208   | 4.531258  | -2.889169 |
| 225 | 1 | 0 | 2.727252   | 5.307053  | -2.690067 |
| 226 | 6 | 0 | -7.333580  | 2.907494  | 1.960100  |
| 227 | 1 | 0 | -7.566030  | 3.740558  | 2.633263  |
| 228 | 1 | 0 | -6.246334  | 2.780159  | 1.997418  |
| 229 | 6 | 0 | -10.107132 | 5.912071  | -1.062711 |
| 230 | 6 | 0 | -9.681080  | -4.454851 | 0.273786  |
| 231 | 6 | 0 | -11.486694 | 0.202870  | 5.506972  |
| 232 | 1 | 0 | -11.209484 | -0.856867 | 5.508421  |
| 233 | 1 | 0 | -12.489238 | 0.285041  | 5.945588  |
| 234 | 1 | 0 | -10.784617 | 0.733399  | 6.161426  |
| 235 | 6 | 0 | -1.272537  | -4.025242 | 4.110619  |
| 236 | 1 | 0 | -2.189161  | -4.550724 | 3.850059  |
| 237 | 6 | 0 | 0.971827   | 4.785135  | -3.824303 |
| 238 | 1 | 0 | 0.930859   | 5.746044  | -4.328631 |
| 239 | 6 | 0 | 0.764723   | -3.855054 | 5.380145  |
| 240 | 1 | 0 | 1.464603   | -4.246521 | 6.114013  |
| 241 | 6 | 0 | -0.851210  | 5.049616  | 3.830655  |
| 242 | 1 | 0 | -1.545559  | 5.741853  | 4.294646  |
| 243 | 6 | 0 | 0.472107   | 5.470710  | 3.589914  |
| 244 | 1 | 0 | 0.775145   | 6.475531  | 3.869192  |
| 245 | 6 | 0 | -12.339109 | -0.697410 | -3.144704 |
| 246 | 1 | 0 | -12.083550 | -1.716218 | -2.834661 |
| 247 | 1 | 0 | -13.383099 | -0.702676 | -3.484597 |
| 248 | 1 | 0 | -12.270883 | -0.053442 | -2.259953 |
| 249 | 6 | 0 | -0.392787  | -4.572431 | 5.031236  |
| 250 | 1 | 0 | -0.599669  | -5.533459 | 5.492806  |
| 251 | 6 | 0 | -11.884396 | 1.221173  | -4.680051 |
| 252 | 1 | 0 | -11.854411 | 1.923073  | -3.838367 |
| 253 | 1 | 0 | -12.922378 | 1.171644  | -5.030691 |
| 254 | 1 | 0 | -11.279849 | 1.636671  | -5.495238 |
| 255 | 6 | 0 | -11.544159 | -1.113636 | -5.503897 |
| 256 | 1 | 0 | -10.900463 | -0.771695 | -6.323373 |
| 257 | 1 | 0 | -12.580855 | -1.122026 | -5.865210 |
| 258 | 1 | 0 | -11.264127 | -2.146274 | -5.268556 |
| 259 | 6 | 0 | -10.804654 | -5.507983 | 0.329101  |
| 260 | 6 | 0 | -11.331482 | -5.731773 | 1.760247  |
| 261 | 1 | 0 | -10.545395 | -6.092791 | 2.434232  |
| 262 | 1 | 0 | -12.125690 | -6.487838 | 1.746669  |
| 263 | 1 | 0 | -11.756637 | -4.815465 | 2.187312  |
| 264 | 6 | 0 | -11.431436 | 5.539195  | -0.352422 |
| 265 | 1 | 0 | -11.871128 | 4.636543  | -0.793140 |
| 266 | 1 | 0 | -12.160296 | 6.354972  | -0.445727 |
| 267 | 1 | 0 | -11.280781 | 5.348770  | 0.716069  |
| 268 | 6 | 0 | -12.481871 | 0.029435  | 3.191854  |
| 269 | 1 | 0 | -12.498109 | 0.435313  | 2.173682  |
| 270 | 1 | 0 | -13.494332 | 0.109385  | 3.607725  |
| 271 | 1 | 0 | -12.232489 | -1.034763 | 3.122413  |
| 272 | 6 | 0 | -9.528432  | 7.194404  | -0.416379 |
| 273 | 1 | 0 | -9.318285  | 7.053563  | 0.649650  |
| 274 | 1 | 0 | -10.239041 | 8.026170  | -0.509391 |
| 275 | 1 | 0 | -8.592065  | 7.489101  | -0.904915 |
| 276 | 6 | 0 | -11.947835 | 2.266261  | 4.173253  |
| 277 | 1 | 0 | -11.288355 | 2.869732  | 4.808617  |
| 278 | 1 | 0 | -12.950915 | 2.299875  | 4.614424  |
| 279 | 1 | 0 | -12.006770 | 2.741838  | 3.187310  |



|     |   |   |            |           |           |
|-----|---|---|------------|-----------|-----------|
| 280 | 6 | 0 | -10.273015 | -6.862280 | -0.200571 |
| 281 | 1 | 0 | -9.918681  | -6.783805 | -1.234269 |
| 282 | 1 | 0 | -9.436870  | -7.220494 | 0.411869  |
| 283 | 1 | 0 | -11.065153 | -7.622021 | -0.175455 |
| 284 | 6 | 0 | -11.994567 | -5.051295 | -0.549770 |
| 285 | 1 | 0 | -12.396404 | -4.093842 | -0.197651 |
| 286 | 1 | 0 | -12.802698 | -5.793713 | -0.517525 |
| 287 | 1 | 0 | -11.701625 | -4.925159 | -1.597793 |
| 288 | 6 | 0 | 9.727057   | 6.931860  | -1.346494 |
| 289 | 1 | 0 | 9.508099   | 6.620944  | -2.374115 |
| 290 | 1 | 0 | 10.453525  | 7.753709  | -1.393900 |
| 291 | 1 | 0 | 8.799171   | 7.322157  | -0.911207 |
| 292 | 6 | 0 | 10.285802  | 5.762287  | -0.499310 |
| 293 | 6 | 0 | 10.620193  | 6.309102  | 0.902481  |
| 294 | 1 | 0 | 9.735411   | 6.719915  | 1.403270  |
| 295 | 1 | 0 | 11.355801  | 7.117884  | 0.817339  |
| 296 | 1 | 0 | 11.053000  | 5.536833  | 1.549675  |
| 297 | 6 | 0 | 11.601330  | 5.256308  | -1.139608 |
| 298 | 1 | 0 | 12.023946  | 4.426449  | -0.561020 |
| 299 | 1 | 0 | 12.345680  | 6.062461  | -1.175406 |
| 300 | 1 | 0 | 11.445184  | 4.902583  | -2.164605 |
| 301 | 8 | 0 | 2.215170   | -1.980601 | 5.149288  |
| 302 | 6 | 0 | 2.028808   | -0.751023 | 5.863555  |
| 303 | 1 | 0 | 1.478482   | -0.023553 | 5.258742  |
| 304 | 1 | 0 | 1.495121   | -0.935155 | 6.805777  |
| 305 | 1 | 0 | 3.030635   | -0.373483 | 6.083541  |
| 306 | 8 | 0 | 3.045108   | 2.992969  | -1.321010 |
| 307 | 6 | 0 | 4.001726   | 3.993327  | -0.991991 |
| 308 | 1 | 0 | 4.587277   | 4.292825  | -1.871285 |
| 309 | 1 | 0 | 3.515361   | 4.878382  | -0.559948 |
| 310 | 1 | 0 | 4.669711   | 3.535689  | -0.264263 |
| 311 | 8 | 0 | -2.529465  | 3.286207  | 3.684637  |
| 312 | 6 | 0 | -3.468970  | 4.132014  | 4.328705  |
| 313 | 1 | 0 | -3.132544  | 4.411414  | 5.336462  |
| 314 | 1 | 0 | -3.660942  | 5.041274  | 3.742903  |
| 315 | 1 | 0 | -4.390837  | 3.551875  | 4.405488  |
| 316 | 8 | 0 | -2.737732  | -3.994639 | -0.645520 |
| 317 | 6 | 0 | -3.958834  | -3.673898 | -1.319580 |
| 318 | 1 | 0 | -3.801002  | -2.865700 | -2.041382 |
| 319 | 1 | 0 | -4.355970  | -4.557705 | -1.838483 |
| 320 | 1 | 0 | -4.664884  | -3.339254 | -0.560316 |
| 321 | 1 | 0 | -0.982352  | 1.583299  | -0.272847 |

---

## References:

---

1. M. Llunell, D. Casanova, J. Cirera, J. M. Bofill, P. Alemany, S. Alvarez, M. Pinsky, D. Avnir, *SHAPE, version 2.3*, University of Barcelona, Barcelona, Spain, and Hebrew University of Jerusalem, Jerusalem, Israel, 2013.
